# Supplementary material
Source: PubMed Central journal article supplement (PMC7269390)
Supplement: JCM.00283-20-s0001.pdf [file JCM.00283-20-s0001.pdf]

Table S1.<sup>a</sup> Isolates included in this study

| isolate       | PubMLST |        | geographic origin |              |                 | year isolated | clinical status of source animal | ST using the scheme indicated |           |                 | acc# (GenBank assembly) or depth |        |
|---------------|---------|--------|-------------------|--------------|-----------------|---------------|----------------------------------|-------------------------------|-----------|-----------------|----------------------------------|--------|
|               | ID#     | host   | country           | region       | anatomic origin |               |                                  | PubMLST                       | Weybridge | revised PubMLST | of coverage (private assembly)   | animal |
| <b>PG45</b>   | 96      | bovine | United States     | Connecticut  | milk            | 1961          | mastitis                         | 17                            | 1         | 12              | CP002188.1                       | 1      |
| 2497MB        | 216     | bovine | United States     | California   | nasal cavity    | 2011          | unknown                          | NT2                           | 12        | 15              | LQED01                           | 2      |
| 2887MB        | 217     | bovine | United States     | California   | nasal cavity    | 2011          | unknown                          | NT2                           | 12        | 15              | LQEY01                           | 3      |
| 2930MB        | 327     | bovine | United States     | California   | nasal cavity    | 2011          | unknown                          | NT2                           | 12        | 15              | LQFC01                           | 4      |
| 2133MB        | 328     | bovine | United States     | California   | nasal cavity    | 2011          | unknown                          | NT2                           | 12        | 15              | LQDA01                           | 5      |
| 2154MB        | 329     | bovine | United States     | California   | nasal cavity    | 2011          | unknown                          | NT2                           | 12        | 15              | LQDB01                           | 6      |
| 2255MB        | 330     | bovine | United States     | California   | nasal cavity    | 2011          | unknown                          | NT2                           | 12        | 15              | LQDH01                           | 7      |
| 2223MB        | 331     | bovine | United States     | California   | nasal cavity    | 2011          | unknown                          | NT2                           | 12        | 15              | LQDG01                           | 8      |
| 2320MB        | 332     | bovine | United States     | California   | nasal cavity    | 2011          | unknown                          | NT2                           | 12        | 15              | LQDP01                           | 9      |
| 2297MB        | 333     | bovine | United States     | California   | nasal cavity    | 2011          | unknown                          | NT2                           | 12        | 15              | LQDJ01                           | 10     |
| 2335MB        | 334     | bovine | United States     | California   | nasal cavity    | 2011          | unknown                          | NT2                           | 12        | 15              | LQDR01                           | 11     |
| <b>2351MB</b> | 335     | bovine | United States     | California   | nasal cavity    | 2011          | unknown                          | 51                            | 7         | 14              | LQDT01                           | 12     |
| 2377MB        | 336     | bovine | United States     | California   | nasal cavity    | 2011          | unknown                          | NT2                           | 12        | 15              | LQDU01                           | 13     |
| 2389MB        | 337     | bovine | United States     | California   | nasal cavity    | 2011          | unknown                          | NT2                           | 12        | 15              | LQDV01                           | 14     |
| 2403MB        | 338     | bovine | United States     | California   | nasal cavity    | 2011          | unknown                          | NT2                           | 12        | 15              | LQDX01                           | 15     |
| 2512MB        | 339     | bovine | United States     | California   | nasal cavity    | 2011          | unknown                          | NT4                           | 7         | 14              | LQEF01                           | 16     |
| 2612MB        | 340     | bovine | United States     | California   | nasal cavity    | 2011          | unknown                          | NT2                           | 12        | 15              | LQEO01                           | 17     |
| 2769MB        | 341     | bovine | United States     | California   | nasal cavity    | 2011          | unknown                          | NT2                           | 12        | 15              | LQEW01                           | 18     |
| 3308MB        | 342     | bovine | United States     | California   | nasal cavity    | 2011          | unknown                          | NT2                           | 12        | 15              | LQFU01                           | 19     |
| 2307MB        | 343     | bovine | United States     | California   | nasal cavity    | 2011          | unknown                          | NT2                           | 12        | 15              | LQDM01                           | 20     |
| 2969MB        | 344     | bovine | United States     | California   | nasal cavity    | 2011          | unknown                          | NT4                           | 7         | 14              | LQFF01                           | 21     |
| <b>KRB2</b>   | 382     | bovine | United States     | Kansas       | lung            | 2014          | pneumonia                        | 47                            | 6         | 25              |                                  | 22     |
| <b>KRB3</b>   | 303     | bovine | United States     | Kansas       | lung            | 2014          | pneumonia                        | 3                             | 6         | 23              | 134                              | 23     |
| <b>KRB5</b>   | 215     | bovine | United States     | Kansas       | lung            | 2014          | pneumonia                        | 47                            | 6         | 25              | 268                              | 24     |
| <b>KRB6</b>   | 218     | bovine | United States     | Kansas       | lung            | 2014          | pneumonia                        | 48                            | 26        | 55              | 294                              | 25     |
| <b>KRB7</b>   | 387     | bovine | United States     | Kansas       | lung            | 2014          | pneumonia                        | 3                             | 6         | 23              | 260                              | 26     |
| <b>KRB9</b>   | 301     | bovine | United States     | Iowa         | lung            | 2012          | pneumonia                        | 3                             | 5         | 23              | 267                              | 27     |
| <b>KRB10</b>  | 302     | bovine | United States     | Iowa         | lung            | 2012          | pneumonia                        | 3                             | 5         | 23              | 288                              | 28     |
| <b>KRB11</b>  | 30      | bovine | United States     | Texas        | nasal cavity    | 2011          | pneumonia                        | 30                            | 10        | 27              | 320                              | 29     |
| KRB13         | 1096    | bovine | United States     | Iowa         | nasal cavity    | 2017          | healthy                          | 46                            | 56        | 69              | 120                              | 30     |
| <b>Cs432</b>  | 23      | bovine | United States     | Iowa         | lung            | 1995          | pneumonia, arthritis             | 23                            | 19        | 9               | 131                              | 31     |
| 236-21        | 699     | bovine | United States     | Washington   | milk            | 2008          | mastitis                         | NT1                           | 8         | 21              | WFFY00000000                     | 32     |
| 236-22        | 700     | bovine | United States     | Washington   | milk            | 2008          | mastitis                         | 10                            | 25        | 52              | WFFZ00000000                     | 33     |
| 236-27        | 701     | bovine | United States     | Washington   | milk            | 2008          | mastitis                         | 10                            | 25        | 52              | WFGA00000000                     | 34     |
| 236-28        | 702     | bovine | United States     | Washington   | milk            | 2008          | mastitis                         | 150                           | 69        | 52              | WFGB00000000                     | 35     |
| 236-38        | 703     | bovine | United States     | Washington   | milk            | 2008          | mastitis                         | 30                            | 13        | 27              | WFGC00000000                     | 36     |
| 236-47        | 704     | bovine | United States     | Washington   | milk            | 2007          | mastitis                         | 151                           | 70        | 63              | WFGD00000000                     | 37     |
| 236-48        | 705     | bovine | United States     | Washington   | milk            | 2007          | mastitis                         | 10                            | 25        | 52              | WFG00000000                      | 38     |
| 237-4         | 706     | bovine | United States     | Washington   | milk            | 2006          | mastitis                         | 10                            | 25        | 52              | WFGF00000000                     | 39     |
| 237-7         | 707     | bovine | United States     | Washington   | milk            | 2007          | mastitis                         | 152                           | 71        | 3               | WFGG00000000                     | 40     |
| 237-8         | 708     | bovine | United States     | Washington   | milk            | 2007          | mastitis                         | 5                             | 8         | 21              | WFGH00000000                     | 41     |
| 237-9         | 709     | bovine | United States     | Washington   | milk            | 2007          | mastitis                         | 5                             | 8         | 21              | WFGI00000000                     | 42     |
| 237-10        | 710     | bovine | United States     | Washington   | milk            | 2007          | mastitis                         | 5                             | 72        | 21              | WFGJ00000000                     | 43     |
| 272-37        | 711     | bovine | United States     | Washington   | milk            | 2017          | mastitis                         | NT17                          | 23        | 66              | WFGK00000000                     | 44     |
| 272-41        | 712     | bovine | United States     | Washington   | milk            | 2017          | mastitis                         | 153                           | 36        | 46              | WFL00000000                      | 45     |
| 272-43        | 713     | bovine | United States     | Washington   | milk            | 2017          | mastitis                         | NT17                          | 23        | 66              | WFGM00000000                     | 46     |
| 272-45        | 714     | bovine | United States     | Washington   | milk            | 2017          | mastitis                         | NT17                          | 23        | 66              | WFGN00000000                     | 47     |
| 272-47        | 715     | bovine | United States     | Washington   | milk            | 2017          | mastitis                         | NT17                          | 23        | 66              | WFGO00000000                     | 48     |
| 274-7         | 716     | bovine | United States     | Washington   | milk            | 2017          | mastitis                         | NT17                          | 23        | 66              | WFGP00000000                     | 49     |
| 274-9         | 717     | bovine | United States     | Washington   | milk            | 2017          | mastitis                         | NT17                          | 23        | 66              | WFGQ00000000                     | 50     |
| 274-15        | 718     | bovine | United States     | Washington   | milk            | 2017          | mastitis                         | 124                           | 36        | 45              | WFGR00000000                     | 51     |
| <b>MJ11</b>   | 397     | bovine | Canada            | Alberta      | lung            | 2015          | pneumonia                        | 123                           | 25        | 65              | 328                              | 52     |
| <b>MJ12</b>   | 398     | bovine | Canada            | Alberta      | lung            | 2015          | pneumonia                        | 121                           | 16        | 42              | 342                              | 53     |
| <b>MJ13</b>   | 399     | bovine | Canada            | Alberta      | lung            | 2015          | pneumonia, arthritis             | NT3                           | 25        | 62              | 158                              | 54     |
| <b>MJ14</b>   | 400     | bovine | Canada            | Alberta      | lung            | 2015          | pneumonia                        | 123                           | 25        | 65              | 175                              | 55     |
| <b>MJ15</b>   | 401     | bovine | Canada            | Alberta      | lung            | 2015          | pneumonia                        | 108                           | 25        | 70              | 145                              | 56     |
| <b>MJ16</b>   | 402     | bovine | Canada            | Alberta      | lung            | 2015          | pneumonia                        | 121                           | 16        | 42              | 197                              | 57     |
| <b>MJ17</b>   | 403     | bovine | Canada            | Alberta      | lung            | 2015          | pneumonia                        | 121                           | 16        | 42              | 65                               | 58     |
| <b>MJ18</b>   | 404     | bovine | Canada            | Alberta      | lung            | 2015          | pneumonia                        | 122                           | 35        | 80              | 141                              | 59     |
| <b>MJ19</b>   | 405     | bovine | Canada            | Alberta      | lung            | 2015          | pneumonia                        | 108                           | 25        | 70              | 96                               | 60     |
| <b>MJ21</b>   | 407     | bovine | Canada            | Alberta      | lung            | 2015          | pneumonia                        | 121                           | 16        | 42              | 166                              | 61     |
| <b>MJ22</b>   | 408     | bovine | Canada            | Alberta      | lung            | 2015          | pneumonia                        | 123                           | 25        | 65              | 125                              | 62     |
| <b>MJ23</b>   | 409     | bovine | Canada            | Alberta      | lung            | 2015          | pneumonia                        | 121                           | 18        | 42              | 176                              | 63     |
| <b>MJ24</b>   | 410     | bovine | Canada            | Alberta      | lung            | 2015          | pneumonia                        | 10                            | 25        | 52              | 164                              | 64     |
| <b>MJ26</b>   | 412     | bovine | Canada            | Alberta      | joint           | 2016          | pneumonia, arthritis             | 109                           | 22        | 71              | 95                               | 65     |
| MJ294         | 506     | bovine | Canada            | Alberta      | lung            | 2016          | pneumonia, arthritis             | 109                           | 22        | 71              | 92                               | 65     |
| <b>MJ28</b>   | 414     | bovine | Canada            | Alberta      | joint           | 2015          | pneumonia, arthritis             | 124                           | 36        | 45              | 101                              | 66     |
| <b>MJ29</b>   | 415     | bovine | Canada            | Alberta      | lung            | 2015          | pneumonia, arthritis             | 124                           | 36        | 45              | 159                              | 66     |
| <b>MJ30</b>   | 416     | bovine | Canada            | Alberta      | lung            | 2007          | pneumonia                        | 10                            | 25        | 52              | 183                              | 67     |
| <b>MJ32</b>   | 418     | bovine | Canada            | Alberta      | joint           | 2007          | pneumonia, arthritis             | 125                           | 3         | 2               | 176                              | 68     |
| <b>MJ33</b>   | 419     | bovine | Canada            | Alberta      | nasal cavity    | 2007          | pneumonia, arthritis             | 125                           | 3         | 2               | 99                               | 68     |
| <b>MJ34</b>   | 420     | bovine | Canada            | Alberta      | lung            | 2007          | pneumonia, arthritis             | 125                           | 3         | 2               | 193                              | 68     |
| <b>MJ36</b>   | 422     | bovine | Canada            | Alberta      | joint           | 2007          | pneumonia, arthritis             | 10                            | 15        | 16              | 213                              | 69     |
| <b>MJ37</b>   | 423     | bovine | Canada            | Saskatchewan | lung            | 2007          | healthy                          | 126                           | 23        | 48              | 86                               | 70     |
| <b>MJ38</b>   | 424     | bovine | Canada            | Saskatchewan | nasal cavity    | 2007          | healthy                          | 2                             | 13        | 24              | 33                               | 71     |
| MJ290         | 507     | bovine | Canada            | Saskatchewan | nasal cavity    | 2007          | healthy                          | 108                           | 25        | 70              | 97                               | 71     |
| MJ42          | 508     | bovine | Canada            | Alberta      | lung            | 2016          | pneumonia, arthritis             | NT21                          | 2         | 19              | 28                               | 72     |
| <b>MJ43</b>   | 429     | bovine | Canada            | Alberta      | lung            | 2015          | pneumonia, arthritis             | 10                            | 34        | 76              | 75                               | 72     |
| <b>MJ114</b>  | 500     | bovine | Canada            | Alberta      | joint           | 2015          | pneumonia, arthritis             | 10                            | 34        | 76              | 72                               | 73     |
| <b>MJ44</b>   | 430     | bovine | Canada            | Alberta      | lung            | 2015          | pneumonia                        | 128                           | 16        | 41              | 51                               | 74     |
| <b>MJ45</b>   | 431     | bovine | Canada            | Alberta      | lung            | 2015          | pneumonia                        | 123                           | 25        | 65              | 54                               | 75     |
| <b>MJ52</b>   | 438     | bovine | Canada            | Saskatchewan | nasal cavity    | 2008          | pneumonia                        | 2                             | 13        | 24              | 40                               | 76     |
| <b>MJ59</b>   | 445     | bovine | Canada            | Saskatchewan | nasal cavity    | 2008          | pneumonia                        | 2                             | 25        | 62              | 83                               | 76     |
| <b>MJ67</b>   | 453     | bovine | Canada            | Saskatchewan | nasal cavity    | 2007          | healthy                          | 2                             | 13        | 24              | 85                               | 77     |
| <b>MJ50</b>   | 436     | bovine | Canada            | Saskatchewan | nasal cavity    | 2007          | pneumonia                        | 2                             | 13        | 24              | 47                               | 78     |
| <b>MJ49</b>   | 435     | bovine | Canada            | Saskatchewan | nasal cavity    | 2007          | healthy                          | 125                           | 4         | 40              | 37                               | 79     |
| <b>MJ55</b>   | 441     | bovine | Canada            | Saskatchewan | nasal cavity    | 2007          | healthy                          | 125                           | 4         | 40              | 51                               | 80     |
| <b>MJ53</b>   | 439     | bovine | Canada            | Saskatchewan | lung            | 2007          | healthy                          | 125                           | 4         | 40              | 62                               | 81     |
| <b>MJ54</b>   | 440     | bovine | Canada            | Saskatchewan | nasal cavity    | 2007          | healthy                          | 5                             | 8         | 21              | 64                               | 82     |
| <b>MJ56</b>   | 442     | bovine | Canada            | Saskatchewan | nasal cavity    | 2007          | healthy                          | 126                           | 23        | 48              | 47                               | 83     |
| <b>MJ78</b>   | 464     | bovine | Canada            | Saskatchewan | nasal cavity    | 2007          | healthy                          | 2                             | 13        | 24              | 86                               | 84     |
| <b>MJ60</b>   | 446     | bovine | Canada            | Saskatchewan | nasal cavity    | 2007          | healthy                          | 125                           | 4         | 40              | 85                               | 85     |
| <b>MJ61</b>   | 447     | bovine | Canada            | Alberta      | joint           | 2008          | pneumonia, arthritis             | 111                           | 37        | 75              | 27                               | 86     |
| <b>MJ62</b>   | 448     | bovine | Canada            | Alberta      | lung            | 2008          | pneumonia                        | 123                           | 25        | 65              | 83                               | 87     |
| <b>MJ63</b>   | 449     | bovine | Canada            | Saskatchewan | lung            | 2008          | pneumonia                        | 10                            | 25        | 52              | 69                               | 88     |
| <b>MJ64</b>   | 450     | bovine | Canada            | Alberta      | joint           | 2007          | pneumonia, arthritis             | 10                            | 25        | 52              | 37                               | 89     |
| <b>MJ65</b>   | 451     | bovine | Canada            | Alberta      | lung            | 2007          | pneumonia                        | 5                             | 8         | 21              | 41                               | 90     |

|              |      |        |        |                |               |      |                      |      |    |    |               |     |
|--------------|------|--------|--------|----------------|---------------|------|----------------------|------|----|----|---------------|-----|
| <b>MJ66</b>  | 452  | bovine | Canada | Alberta        | lung          | 2007 | pneumonia            | 112  | 15 | 36 | 41            | 91  |
| <b>MJ70</b>  | 456  | bovine | Canada | Saskatchewan   | nasal cavity  | 2007 | healthy              | 2    | 13 | 24 | 38            | 92  |
| <b>MJ72</b>  | 458  | bovine | Canada | Saskatchewan   | nasal cavity  | 2007 | healthy              | 5    | 8  | 21 | 51            | 93  |
| <b>MJ73</b>  | 459  | bovine | Canada | Saskatchewan   | nasal cavity  | 2007 | healthy              | 5    | 8  | 21 | 33            | 94  |
| <b>MJ74</b>  | 460  | bovine | Canada | Saskatchewan   | nasal cavity  | 2007 | healthy              | 2    | 13 | 24 | 65            | 95  |
| <b>MJ75</b>  | 461  | bovine | Canada | Saskatchewan   | nasal cavity  | 2007 | healthy              | 113  | 9  | 22 | 53            | 96  |
| <b>MJ77</b>  | 463  | bovine | Canada | Saskatchewan   | nasal cavity  | 2007 | healthy              | 2    | 13 | 24 | 87            | 97  |
| MJ79         | 465  | bovine | Canada | Alberta        | lung          | 2008 | pneumonia            | NT3  | 25 | 62 | 41            | 98  |
| MJ80         | 466  | bovine | Canada | Alberta        | joint         | 2008 | pneumonia, arthritis | NT3  | 25 | 62 | 25            | 99  |
| <b>MJ81</b>  | 467  | bovine | Canada | Alberta        | lung          | 2009 | pneumonia, arthritis | 114  | 34 | 78 | 111           | 100 |
| <b>MJ85</b>  | 471  | bovine | Canada | Saskatchewan   | nasal cavity  | 2007 | healthy              | 2    | 13 | 24 | 90            | 101 |
| <b>MJ86</b>  | 472  | bovine | Canada | Alberta        | lung          | 2015 | pneumonia, arthritis | 10   | 34 | 76 | 35            | 102 |
| <b>MJ87</b>  | 473  | bovine | Canada | Alberta        | lung          | 2014 | pneumonia            | 12   | 27 | 64 | 54            | 103 |
| <b>MJ89</b>  | 475  | bovine | Canada | Alberta        | joint         | 2014 | pneumonia, arthritis | 121  | 16 | 42 | 36            |     |
| <b>MJ99</b>  | 485  | bovine | Canada | Alberta        | lung          | 2014 | pneumonia, arthritis | 121  | 16 | 42 | 100           | 104 |
| <b>MJ90</b>  | 476  | bovine | Canada | Alberta        | lung          | 2014 | pneumonia            | 109  | 22 | 71 | 88            | 105 |
| <b>MJ92</b>  | 478  | bovine | Canada | Alberta        | lung          | 2014 | pneumonia            | 130  | 25 | 57 | 34            | 106 |
| <b>MJ94</b>  | 480  | bovine | Canada | western Canada | ear           | 2015 | otitis               | 10   | 24 | 52 | 66            | 107 |
| <b>MJ95</b>  | 481  | bovine | Canada | Alberta        | lung          | 2014 | pneumonia            | 130  | 25 | 57 | 84            | 108 |
| <b>MJ96</b>  | 482  | bovine | Canada | Alberta        | lung          | 2014 | pneumonia            | 121  | 16 | 42 | 48            | 109 |
| <b>MJ98</b>  | 484  | bovine | Canada | Alberta        | joint         | 2014 | pneumonia, arthritis | 128  | 14 | 17 | 81            |     |
| <b>MJ101</b> | 487  | bovine | Canada | Alberta        | lung          | 2014 | pneumonia, arthritis | 128  | 14 | 17 | 64            | 110 |
| <b>MJ100</b> | 486  | bovine | Canada | Alberta        | lung          | 2014 | pneumonia            | 57   | 20 | 43 | 63            | 111 |
| <b>MJ102</b> | 488  | bovine | Canada | Alberta        | joint         | 2014 | arthritis            | 10   | 34 | 76 | 61            |     |
| <b>MJ161</b> | 883  | bovine | Canada | Alberta        | joint         | 2014 | arthritis            | 12   | 27 | 64 | PCR amplicons |     |
| <b>MJ162</b> | 884  | bovine | Canada | Alberta        | joint         | 2014 | arthritis            | 121  | 16 | 42 | PCR amplicons | 112 |
| <b>MJ104</b> | 490  | bovine | Canada | Alberta        | lung          | 2014 | pneumonia, arthritis | 109  | 22 | 71 | 72            |     |
| <b>MJ155</b> | 880  | bovine | Canada | Alberta        | lung          | 2014 | pneumonia, arthritis | 10   | 34 | 76 | PCR amplicons |     |
| <b>MJ156</b> | 881  | bovine | Canada | Alberta        | lung          | 2014 | pneumonia, arthritis | 125  | 3  | 2  | PCR amplicons | 113 |
| <b>MJ105</b> | 491  | bovine | Canada | Alberta        | joint         | 2014 | arthritis            | 109  | 22 | 71 | 116           | 114 |
| <b>MJ108</b> | 494  | bovine | Canada | Alberta        | lung          | 2015 | pneumonia            | 123  | 25 | 65 | 41            | 115 |
| MJ41         | 509  | bovine | Canada | Alberta        | lung          | 2015 | pneumonia, arthritis | NT18 | 11 | 20 | 41            |     |
| <b>MJ109</b> | 495  | bovine | Canada | Alberta        | joint         | 2015 | pneumonia, arthritis | 125  | 3  | 2  | 45            |     |
| <b>MJ192</b> | 874  | bovine | Canada | Alberta        | lung          | 2015 | pneumonia, arthritis | 73   | 2  | 19 | PCR amplicons |     |
| <b>MJ193</b> | 875  | bovine | Canada | Alberta        | lung          | 2015 | pneumonia, arthritis | 6    | 11 | 20 | PCR amplicons | 116 |
| <b>MJ110</b> | 496  | bovine | Canada | Alberta        | lung          | 2015 | pneumonia            | 12   | 27 | 64 | 63            | 117 |
| <b>MJ111</b> | 497  | bovine | Canada | Alberta        | lung or joint | 2015 | pneumonia            | 123  | 25 | 65 | 64            | 118 |
| <b>MJ112</b> | 498  | bovine | Canada | Alberta        | joint         | 2014 | pneumonia, arthritis | 121  | 16 | 42 | 61            |     |
| <b>MJ113</b> | 499  | bovine | Canada | Alberta        | lung          | 2014 | pneumonia, arthritis | 10   | 34 | 76 | 79            |     |
| <b>MJ188</b> | 873  | bovine | Canada | Alberta        | joint         | 2014 | pneumonia, arthritis | 130  | 25 | 57 | PCR amplicons | 119 |
| <b>MJ115</b> | 501  | bovine | Canada | Alberta        | lung or joint | 2015 | pneumonia            | 10   | 34 | 76 | 116           | 120 |
| <b>MJ117</b> | 503  | bovine | Canada | Alberta        | lung          | 2015 | pneumonia            | 125  | 3  | 2  | 50            | 121 |
| <b>MJ118</b> | 504  | bovine | Canada | Alberta        | lung          | 2014 | pneumonia, arthritis | 121  | 16 | 42 | 41            |     |
| <b>MJ119</b> | 505  | bovine | Canada | Alberta        | joint         | 2014 | pneumonia, arthritis | 10   | 34 | 76 | 45            | 122 |
| <b>MJ120</b> | 763  | bovine | Canada | Alberta        | lung          | 2015 | pneumonia            | 123  | 25 | 65 | 54            | 123 |
| <b>MJ232</b> | 896  | bovine | Canada | Saskatchewan   | nasal cavity  | 2008 | pneumonia            | 125  | 3  | 2  | PCR amplicons | 124 |
| MJ203        | 893  | bovine | Canada | Saskatchewan   | nasal cavity  | 2008 | pneumonia            | 125  | 3  | 2  | PCR amplicons |     |
| MJ204        | 894  | bovine | Canada | Saskatchewan   | nasal cavity  | 2008 | pneumonia            | 5    | 74 | 21 | PCR amplicons | 125 |
| MJ234        | 510  | bovine | Canada | Alberta        | lung          | 2016 | pneumonia, arthritis | 174  | 34 | 77 | 73            | 126 |
| MJ235        | 511  | bovine | Canada | Alberta        | lung          | 2016 | pneumonia, arthritis | 123  | 25 | 65 | 137           |     |
| MJ236        | 512  | bovine | Canada | Alberta        | joint         | 2016 | pneumonia, arthritis | 123  | 25 | 65 | 104           | 127 |
| MJ237        | 513  | bovine | Canada | Alberta        | lung          | 2016 | pneumonia, arthritis | NT18 | 23 | 60 | 106           |     |
| MJ238        | 514  | bovine | Canada | Alberta        | joint         | 2016 | pneumonia, arthritis | NT18 | 23 | 60 | 116           | 128 |
| MJ239        | 515  | bovine | Canada | Alberta        | lung          | 2016 | pneumonia, arthritis | 123  | 25 | 65 | 99            |     |
| MJ240        | 516  | bovine | Canada | Alberta        | joint         | 2016 | pneumonia, arthritis | NT18 | 23 | 60 | 100           | 129 |
| MJ241        | 517  | bovine | Canada | Alberta        | lung          | 2016 | pneumonia, arthritis | NT18 | 23 | 60 | 104           |     |
| MJ242        | 518  | bovine | Canada | Alberta        | joint         | 2016 | pneumonia, arthritis | NT18 | 23 | 60 | 97            | 130 |
| MJ243        | 519  | bovine | Canada | Alberta        | lung          | 2016 | pneumonia, arthritis | NT22 | 28 | 61 | 86            | 131 |
| MJ244        | 520  | bovine | Canada | Alberta        | lung          | 2016 | pneumonia, arthritis | NT18 | 23 | 60 | 86            |     |
| MJ245        | 521  | bovine | Canada | Alberta        | joint         | 2016 | pneumonia, arthritis | NT18 | 23 | 60 | 100           | 132 |
| MJ246        | 522  | bovine | Canada | Alberta        | joint         | 2016 | pneumonia, arthritis | 10   | 25 | 52 | 38            | 133 |
| MJ247        | 523  | bovine | Canada | Alberta        | lung          | 2017 | pneumonia, arthritis | 123  | 25 | 65 | 64            |     |
| MJ248        | 524  | bovine | Canada | Alberta        | joint         | 2017 | pneumonia, arthritis | 123  | 25 | 65 | 83            | 134 |
| MJ249        | 525  | bovine | Canada | Alberta        | lung          | 2016 | pneumonia, arthritis | NT18 | 23 | 60 | 89            |     |
| MJ250        | 526  | bovine | Canada | Alberta        | joint         | 2016 | pneumonia, arthritis | NT18 | 23 | 60 | 107           | 135 |
| MJ251        | 527  | bovine | Canada | Alberta        | lung          | 2016 | pneumonia, arthritis | 123  | 25 | 65 | 130           |     |
| MJ252        | 528  | bovine | Canada | Alberta        | joint         | 2016 | pneumonia, arthritis | 175  | 34 | 79 | 81            | 136 |
| MJ253        | 529  | bovine | Canada | Alberta        | lung          | 2016 | pneumonia            | NT18 | 23 | 60 | 89            | 137 |
| MJ254        | 1057 | bovine | Canada | Alberta        | joint         | 2016 | pneumonia, arthritis | 123  | 25 | 65 | 66            | 138 |
| MJ255        | 1058 | bovine | Canada | Alberta        | lung          | 2017 | pneumonia, arthritis | 10   | 25 | 52 | 101           |     |
| MJ256        | 1059 | bovine | Canada | Alberta        | joint         | 2017 | pneumonia, arthritis | 10   | 25 | 52 | 118           | 139 |
| MJ257        | 1060 | bovine | Canada | Alberta        | lung          | 2017 | pneumonia, arthritis | 10   | 25 | 52 | 120           | 140 |
| MJ258        | 1061 | bovine | Canada | Alberta        | lung          | 2017 | pneumonia, arthritis | NT18 | 23 | 60 | 130           |     |
| MJ259        | 1062 | bovine | Canada | Alberta        | joint         | 2017 | pneumonia, arthritis | 125  | 3  | 2  | 110           | 141 |
| MJ260        | 1063 | bovine | Canada | Alberta        | lung          | 2017 | pneumonia, arthritis | NT1  | 8  | 21 | 100           | 142 |
| MJ261        | 1064 | bovine | Canada | Alberta        | lung          | 2017 | pneumonia, arthritis | NT20 | 23 | 67 | 135           |     |
| MJ262        | 1065 | bovine | Canada | Alberta        | joint         | 2017 | pneumonia, arthritis | NT20 | 23 | 67 | 97            | 143 |
| MJ263        | 1066 | bovine | Canada | Alberta        | lung          | 2017 | pneumonia, arthritis | NT19 | 17 | 68 | 33            | 144 |
| MJ264        | 1067 | bovine | Canada | Alberta        | joint         | 2017 | pneumonia, arthritis | 176  | 25 | 59 | 146           | 145 |
| MJ265        | 1068 | bovine | Canada | Alberta        | lung          | 2017 | pneumonia, arthritis | NT1  | 8  | 21 | 141           |     |
| MJ266        | 1069 | bovine | Canada | Alberta        | joint         | 2017 | pneumonia, arthritis | 122  | 35 | 80 | 164           | 146 |
| MJ267        | 1070 | bovine | Canada | Alberta        | lung          | 2017 | pneumonia, arthritis | 177  | 36 | 44 | 93            |     |
| MJ268        | 1071 | bovine | Canada | Alberta        | joint         | 2017 | pneumonia, arthritis | 177  | 36 | 44 | 132           | 147 |
| MJ269        | 1072 | bovine | Canada | Alberta        | lung          | 2017 | pneumonia, arthritis | NT20 | 23 | 67 | 77            |     |
| MJ270        | 1073 | bovine | Canada | Alberta        | joint         | 2017 | pneumonia, arthritis | 10   | 25 | 52 | 155           | 148 |
| MJ271        | 1074 | bovine | Canada | Alberta        | lung          | 2017 | pneumonia, arthritis | NT20 | 23 | 67 | 140           |     |
| MJ272        | 1075 | bovine | Canada | Alberta        | joint         | 2017 | pneumonia, arthritis | 177  | 36 | 44 | 143           | 149 |
| MJ273        | 1076 | bovine | Canada | Alberta        | lung          | 2017 | pneumonia, arthritis | 177  | 36 | 44 | 108           |     |
| MJ274        | 1077 | bovine | Canada | Alberta        | joint         | 2017 | pneumonia, arthritis | 177  | 36 | 44 | 54            | 150 |
| MJ275        | 1078 | bovine | Canada | Alberta        | lung          | 2017 | pneumonia, arthritis | 177  | 36 | 44 | 74            | 151 |
| MJ276        | 1079 | bovine | Canada | Alberta        | joint         | 2017 | pneumonia, arthritis | NT20 | 23 | 67 | 99            |     |
| MJ277        | 1080 | bovine | Canada | Alberta        | lung          | 2017 | pneumonia, arthritis | NT20 | 23 | 67 | 93            | 152 |
| MJ278        | 1081 | bovine | Canada | Alberta        | joint         | 2017 | pneumonia, arthritis | 177  | 36 | 44 | 81            |     |
| MJ279        | 1082 | bovine | Canada | Alberta        | lung          | 2017 | pneumonia, arthritis | 10   | 25 | 52 | 68            | 153 |
| MJ280        | 1083 | bovine | Canada | Alberta        | lung          | 2017 | pneumonia, arthritis | 178  | 21 | 45 | 68            |     |
| MJ281        | 1084 | bovine | Canada | Alberta        | joint         | 2017 | pneumonia, arthritis | 177  | 36 | 44 | 70            | 154 |
| MJ282        | 1085 | bovine | Canada | Alberta        | lung          | 2017 | pneumonia, arthritis | NT20 | 23 | 67 | 109           |     |
| MJ283        | 1086 | bovine | Canada | Alberta        | joint         | 2017 | pneumonia, arthritis | NT20 | 23 | 67 | 84            |     |
| MJ284        | 1087 | bovine | Canada | Alberta        | joint         | 2017 | pneumonia, arthritis | 177  | 36 | 44 | 58            | 155 |
| MJ285        | 1088 | bovine | Canada | Alberta        | lung          | 2017 | pneumonia, arthritis | 179  | 36 | 47 | 38            | 156 |

|                        |      |        |                        |                |              |      |                      |      |    |    |               |     |
|------------------------|------|--------|------------------------|----------------|--------------|------|----------------------|------|----|----|---------------|-----|
| MJ286                  | 1089 | bovine | Canada                 | Alberta        | joint        | 2017 | pneumonia, arthritis | 177  | 36 | 44 | 62            |     |
| MJ287                  | 1090 | bovine | Canada                 | Alberta        | lung         | 2017 | pneumonia, arthritis | NT1  | 8  | 21 | 128           | 157 |
| MJ288                  | 1091 | bovine | Canada                 | Alberta        | joint        | 2017 | pneumonia, arthritis | NT20 | 23 | 67 | 123           | 158 |
| MJ289                  | 1092 | bovine | Canada                 | Alberta        | lung         | 2017 | pneumonia, arthritis | 177  | 36 | 44 | 72            | 159 |
| MJ291                  | 1093 | bovine | Canada                 | Alberta        | lung         | 2015 | pneumonia            | NT18 | 23 | 60 | 97            | 160 |
| MJ292                  | 1094 | bovine | Canada                 | Alberta        | lung         | 2014 | pneumonia            | 121  | 16 | 42 | 83            | 161 |
| MJ293                  | 1095 | bovine | Canada                 | Alberta        | lung         | 2015 | pneumonia            | 108  | 25 | 70 | 55            | 162 |
| JF4278                 | 137  | bovine | Switzerland            |                | milk         | 2008 | mastitis, pneumonia  | NT1  | 8  | 21 | LT578453.1    | 163 |
| Somalia                | 148  | bovine | Switzerland            |                | lung         | 2010 | pneumonia            | 5    | 8  | 21 | 150           | 164 |
| PP100                  | 164  | bovine | Switzerland            |                | lung         | 1993 | unknown              | 17   | 73 | 12 | 1184          | 165 |
| 1067                   | 1011 | bovine | France                 | Morbihan       | unknown      | 1983 | unknown              | 171  | 1  | 13 | LAUT01        | 166 |
| 8830                   | 651  | bovine | Hungary <sup>b</sup>   |                | lung         | 2006 | pneumonia            | 14   | 43 | 7  | WFEH00000000  | 167 |
| 2029                   | 652  | bovine | Hungary <sup>b</sup>   |                | lung         | 2006 | pneumonia            | 143  | 43 | 10 | WFEI00000000  | 168 |
| 4877                   | 653  | bovine | Hungary <sup>b</sup>   |                | lung         | 2006 | pneumonia            | 42   | 58 | 6  | WFEJ00000000  | 169 |
| 3374                   | 654  | bovine | Hungary <sup>b</sup>   |                | lung         | 2006 | pneumonia            | 14   | 43 | 7  | WFEK00000000  | 170 |
| 77                     | 655  | bovine | Hungary <sup>b</sup>   |                | lung         | 2006 | pneumonia            | 14   | 43 | 7  | WFEL00000000  | 171 |
| 3893                   | 657  | bovine | Hungary <sup>b</sup>   |                | lung         | 2007 | pneumonia            | 10   | 25 | 52 | WFEM00000000  | 172 |
| 9593                   | 658  | bovine | Hungary <sup>b</sup>   |                | lung         | 2008 | pneumonia            | 18   | 43 | 8  | WFEN00000000  | 173 |
| 2600                   | 659  | bovine | Hungary <sup>b</sup>   |                | lung         | 2008 | pneumonia            | 42   | 58 | 6  | WJDX00000000  | 174 |
| 6866                   | 660  | bovine | Hungary <sup>b</sup>   |                | lung         | 2008 | pneumonia            | 18   | 43 | 8  | WFEO00000000  | 175 |
| 67405                  | 661  | bovine | Hungary <sup>b</sup>   |                | lung         | 2010 | pneumonia            | 18   | 43 | 8  | WFEP00000000  | 176 |
| 97640                  | 662  | bovine | Hungary <sup>b</sup>   |                | lung         | 2011 | pneumonia            | 145  | 58 | 39 | WFEQ00000000  | 177 |
| F597                   | 663  | bovine | Hungary <sup>b</sup>   |                | lung         | 2013 | pneumonia            | NT15 | 59 | 11 | WFER00000000  | 178 |
| F897                   | 664  | bovine | Hungary <sup>b</sup>   |                | lung         | 2014 | pneumonia            | 5    | 8  | 21 | WJDW00000000  | 179 |
| 212255                 | 665  | bovine | Hungary <sup>b</sup>   |                | lung         | 2014 | pneumonia            | 27   | 60 | 26 | WFES00000000  | 180 |
| F1106                  | 666  | bovine | Hungary <sup>b</sup>   |                | lung         | 2016 | pneumonia            | NT8  | 47 | 29 | WFET00000000  | 181 |
| 81                     | 627  | bovine | Lithuania <sup>b</sup> |                | lung         | 2006 | pneumonia            | 17   | 1  | 12 | WFDM00000000  | 182 |
| 7910                   | 628  | bovine | Lithuania <sup>b</sup> |                | lung         | 2007 | pneumonia            | 18   | 43 | 8  | WFDN00000000  | 183 |
| 0-747                  | 629  | bovine | Lithuania <sup>b</sup> |                | lung         | 2008 | pneumonia            | 14   | 43 | 7  | WFDO00000000  | 184 |
| 2832                   | 630  | bovine | Lithuania <sup>b</sup> |                | lung         | 2008 | pneumonia            | 14   | 43 | 7  | WFDP00000000  | 185 |
| 4036                   | 631  | bovine | Lithuania <sup>b</sup> |                | lung         | 2009 | pneumonia            | 14   | 43 | 7  | WFDQ00000000  | 186 |
| F445                   | 633  | bovine | Lithuania <sup>b</sup> |                | lung         | 2011 | pneumonia            | 145  | 58 | 39 | WFDRO00000000 | 187 |
| F472                   | 634  | bovine | Lithuania <sup>b</sup> |                | lung         | 2012 | pneumonia            | 42   | 50 | 6  | WFDS00000000  | 188 |
| F562                   | 635  | bovine | Lithuania <sup>b</sup> |                | lung         | 2012 | pneumonia            | 42   | 50 | 6  | WFDT00000000  | 189 |
| F584                   | 636  | bovine | Lithuania <sup>b</sup> |                | lung         | 2013 | pneumonia            | 42   | 50 | 6  | WFDU00000000  | 190 |
| 140015                 | 623  | bovine | Romania                |                | milk         | 2013 | mastitis             | NT14 | 47 | 32 | WFDI00000000  | 191 |
| 148139                 | 667  | bovine | Romania <sup>b</sup>   |                | lung         | 2012 | pneumonia            | 5    | 8  | 21 | WFEU00000000  | 192 |
| 149697                 | 668  | bovine | Romania <sup>b</sup>   |                | lung         | 2012 | pneumonia            | 5    | 8  | 21 | WFEV00000000  | 193 |
| F790                   | 671  | bovine | Romania <sup>b</sup>   |                | lung         | 2014 | pneumonia            | 5    | 8  | 21 | WFEW00000000  | 194 |
| 253726                 | 672  | bovine | Romania <sup>b</sup>   |                | lung         | 2016 | pneumonia            | NT16 | 61 | 28 | WFEX00000000  | 195 |
| 161801                 | 624  | bovine | Russia                 |                | milk         | 2013 | mastitis             | 10   | 25 | 52 | WFDJ00000000  | 196 |
| 233310                 | 625  | bovine | Russia                 |                | milk         | 2015 | mastitis             | 46   | 56 | 69 | WFDK00000000  | 197 |
| 180323                 | 626  | bovine | Russia                 | Kuban          | milk         | 2013 | mastitis             | 144  | 57 | 49 | WFDL00000000  | 198 |
| <b>KG4397</b>          | 971  | bovine | Japan                  | Kagoshima      | nasal cavity | 2012 | unknown              | 132  | 77 | 1  | AP019558      | 199 |
| <b>Hubei-1</b>         | 26   | bovine | China                  | Hubei          | lung         | 2008 | pneumonia            | 26   | 31 | 53 | CP002513.1    | 200 |
| <b>HB0801</b>          | 97   | bovine | China                  | Hubei          | lung         | 2008 | pneumonia            | 10   | 25 | 52 | CP002058.1    | 201 |
| <b>CQ-W70</b>          | 32   | bovine | China                  | Yunyang County | lung         | 2009 | unknown              | 32   | 31 | 72 | CP005933.1    | 202 |
| NM2012                 | 305  | bovine | China                  | inner Mongolia | joint        | 2012 | pneumonia, arthritis | 10   | 25 | 52 | CP011348.1    | 203 |
| 08M                    | 306  | bovine | China                  | Jiangxi        | lung         | 2008 | pneumonia            | 10   | 25 | 52 | CP019639.1    | 204 |
| Ningxia-1              | 307  | bovine | China                  | Ningxia        | lung         | 2013 | pneumonia            | 134  | 25 | 54 | CP023663.1    | 205 |
| 16M                    | 1010 | bovine | China                  | Shandong       | lung         | 2016 | pneumonia, arthritis | 10   | 25 | 52 | CP038861.1    | 206 |
| HS-130614              | 1012 | bovine | China                  | Hubei          | unknown      | 2013 | unknown              | 10   | 25 | 52 | MAQC01        | 207 |
| J51075-NHD0955         | 788  | bovine | China                  | Hubei          | lung         | 2008 | unknown              | 10   | 25 | 52 | LZYL01        | 208 |
| SZ-NHD0960             | 789  | bovine | China                  | Hubei          | lung         | 2008 | unknown              | 10   | 25 | 52 | LZPT01        | 242 |
| 1834-NHD0953           | 790  | bovine | China                  | Hubei          | lung         | 2008 | unknown              | 10   | 25 | 52 | LZCX01        | 209 |
| EZ-3-NHD0947           | 791  | bovine | China                  | Hubei          | lung         | 2008 | unknown              | 10   | 25 | 52 | MASL01        | 210 |
| EZ-8-NHD0962           | 792  | bovine | China                  | Hubei          | lung         | 2008 | unknown              | 32   | 25 | 72 | LZPU01        | 211 |
| XZ-1-NHD0981           | 793  | bovine | China                  | Hubei          | lung         | 2008 | unknown              | 10   | 25 | 52 | LZQC01        | 212 |
| XZ-2-NHD0946           | 794  | bovine | China                  | Hubei          | lung         | 2008 | unknown              | 10   | 25 | 52 | MASK01        | 213 |
| FX-NHD0970             | 795  | bovine | China                  | Hubei          | lung         | 2008 | unknown              | 10   | 25 | 52 | MARCO1        | 214 |
| NNH-NHD0956            | 796  | bovine | China                  | Hubei          | larynx       | 2010 | unknown              | 10   | 25 | 52 | LZPP01        | 215 |
| ZhX                    | 798  | bovine | China                  | Hubei          | lung         | 2010 | unknown              | 10   | 25 | 52 | MAJH01        | 216 |
| DY-NHD0963             | 799  | bovine | China                  | Hubei          | lung         | 2010 | unknown              | 10   | 25 | 52 | LZPV01        | 217 |
| TY-120615-NHD0952      | 800  | bovine | China                  | Hubei          | lung         | 2012 | unknown              | 10   | 25 | 52 | LZCW01        | 218 |
| JX-NHD0966             | 801  | bovine | China                  | Hubei          | lung         | 2012 | unknown              | 10   | 25 | 52 | LZPY01        | 219 |
| F150tu-NHD0954         | 802  | bovine | China                  | Hubei          | lung         | 2012 | unknown              | 10   | 25 | 52 | LZYG01        | 220 |
| F150niu-NHD0949        | 803  | bovine | China                  | Hubei          | lung         | 2012 | unknown              | 10   | 25 | 52 | LYZB01        | 221 |
| Dyrenong-NHD0951       | 804  | bovine | China                  | Hubei          | lung         | 2012 | unknown              | 10   | 25 | 52 | LYUN01        | 222 |
| HB0801-rengong NHD0989 | 805  | bovine | China                  | Hubei          | lung         | 2012 | unknown              | 10   | 25 | 52 | LZPF01        | 223 |
| SY-NHD0950             | 806  | bovine | China                  | Hubei          | lung         | 2013 | unknown              | 10   | 25 | 52 | LYUM01        | 224 |
| WX-NHD0964             | 807  | bovine | China                  | Hubei          | joint        | 2013 | unknown              | 10   | 25 | 52 | LZPW01        | 225 |
| YC-NHD0967             | 808  | bovine | China                  | Hubei          | milk         | 2013 | unknown              | 10   | 25 | 52 | LZPZ01        | 226 |
| BZ-NHD0982             | 811  | bovine | China                  | Anhui          | lung         | 2008 | unknown              | 10   | 25 | 52 | LZNL01        | 227 |
| XM                     | 812  | bovine | China                  | Fujian         | lung         | 2009 | unknown              | 10   | 25 | 52 | LZPS01        | 228 |
| XMrengong-NHD0985      | 813  | bovine | China                  | Fujian         | lung         | 2012 | unknown              | 10   | 25 | 52 | LZNO01        | 229 |
| LJ1225-NHD0945         | 814  | bovine | China                  | Hunan          | lung         | 2009 | unknown              | 10   | 25 | 52 | LYUL01        | 230 |
| YL-NHD0941             | 815  | bovine | China                  | Henan          | lung         | 2009 | unknown              | 10   | 25 | 52 | LYMD01        | 231 |
| KF                     | 816  | bovine | China                  | Henan          | lung         | 2009 | unknown              | 10   | 25 | 52 | MAJE01        | 232 |
| YL0724-NHD0957         | 817  | bovine | China                  | Henan          | lung         | 2009 | unknown              | 10   | 25 | 52 | LZPQ01        | 233 |
| YJ0719-NHD0958         | 818  | bovine | China                  | Henan          | lung         | 2012 | unknown              | 10   | 25 | 52 | LZPR01        | 234 |
| KEQ-NHD0988            | 819  | bovine | China                  | Henan          | lung         | 2010 | unknown              | 10   | 25 | 52 | LZLNQ01       | 235 |
| KLQ                    | 820  | bovine | China                  | Henan          | lung         | 2010 | unknown              | 10   | 25 | 52 | LZPX01        | 236 |
| ZMD                    | 821  | bovine | China                  | Henan          | lung         | 2011 | unknown              | 10   | 25 | 52 | LZNP01        | 237 |
| YLrengong-NHD0968      | 822  | bovine | China                  | Henan          | lung         | 2012 | unknown              | 10   | 25 | 52 | LZQA01        | 238 |
| YL2086                 | 823  | bovine | China                  | Inner Mongolia | lung         | 2012 | unknown              | 10   | 25 | 52 | LYPO01        | 239 |
| JXXY                   | 824  | bovine | China                  | Jiangxi        | lung         | 2012 | unknown              | 10   | 25 | 52 | LYZA01        | 240 |
| GA-NHD0984             | 825  | bovine | China                  | Jiangxi        | lung         | 2012 | unknown              | 10   | 25 | 52 | LZNN01        | 241 |
| SG-NHD0983             | 828  | bovine | China                  | Guangzhou      | lung         | 2013 | unknown              | 10   | 25 | 52 | LZNM01        | 243 |
| SD-130626-NHD0969      | 829  | bovine | China                  | Shangdong      | lung         | 2013 | unknown              | 10   | 25 | 52 | LZQB01        | 244 |
| EZ-2                   | 1055 | bovine | China                  | Hubei          | unknown      | 2008 | unknown              | 43   | 25 | 56 | LZPE01        | 245 |
| SZ-0527                | 1056 | bovine | China                  | Hubei          | unknown      | 2012 | unknown              | 10   | 75 | 87 | MASM01        | 246 |
| KS-1                   | 531  | bovine | Israel                 |                | milk         | 1994 | mastitis             | 17   | 40 | 12 | WFAC00000000  | 247 |
| KS-11                  | 532  | bovine | Israel                 |                | milk         | 1997 | mastitis             | 17   | 1  | 12 | WFAD00000000  | 248 |
| 337                    | 533  | bovine | Israel                 |                | milk         | 2000 | mastitis             | 137  | 41 | 82 | WFAE00000000  | 249 |
| 800                    | 534  | bovine | Israel                 |                | milk         | 2004 | mastitis             | 137  | 41 | 82 | WFAF00000000  | 250 |
| 301                    | 535  | bovine | Israel                 |                | milk         | 2004 | mastitis             | 138  | 42 | 83 | WFAG00000000  | 251 |

|           |     |        |        |              |         |                |      |    |    |              |     |
|-----------|-----|--------|--------|--------------|---------|----------------|------|----|----|--------------|-----|
| 6099      | 536 | bovine | Israel | milk         | 2007    | mastitis       | 10   | 25 | 52 | WFAH00000000 | 252 |
| 347       | 537 | bovine | Israel | milk         | 2008    | mastitis       | 10   | 25 | 52 | WFAI00000000 | 253 |
| 3574      | 538 | bovine | Israel | milk         | 2008    | mastitis       | 14   | 43 | 7  | WFAJ00000000 | 254 |
| 432       | 539 | bovine | Israel | milk         | 2008    | mastitis       | 10   | 25 | 52 | WFAK00000000 | 255 |
| 928       | 540 | bovine | Israel | milk         | 2008    | mastitis       | 10   | 25 | 52 | WFAL00000000 | 256 |
| 758       | 541 | bovine | Israel | milk         | 2008    | mastitis       | NT6  | 25 | 52 | WFAM00000000 | 257 |
| 2621      | 542 | bovine | Israel | milk         | 2008    | mastitis       | 10   | 25 | 52 | WFAN00000000 | 258 |
| 2622      | 543 | bovine | Israel | milk         | 2008    | mastitis       | 10   | 25 | 52 | WFAO00000000 | 259 |
| 5428      | 544 | bovine | Israel | milk         | 2008    | mastitis       | 10   | 25 | 52 | WFAP00000000 | 260 |
| 2715      | 545 | bovine | Israel | milk         | 2008    | mastitis       | 10   | 25 | 52 | WFAQ00000000 | 261 |
| 110       | 547 | bovine | Israel | milk         | 2008    | mastitis       | 10   | 25 | 52 | WFAR00000000 | 262 |
| 1662      | 548 | bovine | Israel | milk         | 2008    | mastitis       | 10   | 25 | 52 | WFAS00000000 | 263 |
| 100217-23 | 549 | bovine | Israel | milk         | 2008    | mastitis       | 139  | 44 | 81 | WFAT00000000 | 264 |
| 991-2     | 550 | bovine | Israel | milk         | 2008    | mastitis       | 10   | 45 | 52 | WFAU00000000 | 265 |
| 889       | 551 | bovine | Israel | milk         | 2008    | mastitis       | 10   | 25 | 52 | WFAV00000000 | 266 |
| 514       | 552 | bovine | Israel | milk         | 2008    | mastitis       | 17   | 1  | 12 | WFAW00000000 | 267 |
| 10-155    | 553 | bovine | Israel | milk         | 2008    | mastitis       | 10   | 25 | 52 | WFAX00000000 | 268 |
| 783       | 554 | bovine | Israel | milk         | 2009    | mastitis       | 10   | 25 | 52 | WFAY00000000 | 269 |
| 26443     | 555 | bovine | Israel | milk         | 2009    | mastitis       | 10   | 25 | 52 | WFAZ00000000 | 270 |
| 701       | 556 | bovine | Israel | milk         | 2009    | mastitis       | 10   | 25 | 52 | WFBA00000000 | 271 |
| 102168    | 557 | bovine | Israel | milk         | 2009    | mastitis       | 139  | 44 | 81 | WFB00000000  | 272 |
| 299       | 558 | bovine | Israel | milk         | 2010    | mastitis       | 10   | 25 | 52 | WFB00000000  | 273 |
| 883       | 559 | bovine | Israel | milk         | 2010    | mastitis       | 10   | 25 | 52 | WFB00000000  | 274 |
| 86812     | 106 | bovine | Israel | milk         | 2010    | mastitis       | 10   | 25 | 52 | WFB00000000  | 275 |
| 415       | 561 | bovine | Israel | milk         | 2011    | mastitis       | NT7  | 46 | 73 | WFB00000000  | 276 |
| 65714     | 562 | bovine | Israel | milk         | 2011    | mastitis       | 10   | 25 | 52 | WFB00000000  | 277 |
| 111449    | 563 | bovine | Israel | milk         | 2011    | mastitis       | 10   | 25 | 52 | WFB00000000  | 278 |
| 108432    | 564 | bovine | Israel | milk         | 2011    | mastitis       | NT6  | 25 | 52 | WFB00000000  | 279 |
| 127377    | 565 | bovine | Israel | milk         | 2012    | mastitis       | 10   | 25 | 52 | WFB00000000  | 280 |
| 126814    | 566 | bovine | Israel | milk         | 2012    | mastitis       | 10   | 25 | 52 | WFB00000000  | 281 |
| 129771    | 567 | bovine | Israel | milk         | 2012    | mastitis       | 10   | 25 | 52 | WFB00000000  | 282 |
| 145863    | 568 | bovine | Israel | milk         | 2012    | mastitis       | NT8  | 47 | 29 | WFB00000000  | 283 |
| 147524    | 569 | bovine | Israel | milk         | 2012    | mastitis       | NT9  | 48 | 63 | WFB00000000  | 284 |
| 147529    | 570 | bovine | Israel | milk         | 2012    | mastitis       | 10   | 25 | 52 | WFB00000000  | 285 |
| 161791    | 571 | bovine | Israel | milk         | 2012    | mastitis       | 140  | 49 | 33 | WFB00000000  | 286 |
| 138892    | 572 | bovine | Israel | milk         | 2013    | mastitis       | NT9  | 23 | 63 | WFB00000000  | 287 |
| 161032    | 573 | bovine | Israel | milk         | 2013    | mastitis       | NT8  | 47 | 29 | WFB00000000  | 288 |
| 138518    | 574 | bovine | Israel | milk         | 2013    | mastitis       | NT9  | 23 | 63 | WFB00000000  | 289 |
| 139667    | 575 | bovine | Israel | milk         | 2013    | mastitis       | 10   | 25 | 52 | WFB00000000  | 290 |
| 170217    | 576 | bovine | Israel | milk         | 2013    | mastitis       | NT6  | 25 | 52 | WFB00000000  | 291 |
| 170228    | 577 | bovine | Israel | milk         | 2013    | mastitis       | 10   | 25 | 52 | WFB00000000  | 292 |
| 173159    | 578 | bovine | Israel | milk         | 2013    | mastitis       | NT9  | 48 | 63 | WFB00000000  | 293 |
| 171852    | 579 | bovine | Israel | milk         | 2013    | mastitis       | 42   | 50 | 6  | WFB00000000  | 294 |
| 178843    | 580 | bovine | Israel | milk         | 2013    | mastitis       | 10   | 25 | 52 | WFB00000000  | 295 |
| 193896    | 582 | bovine | Israel | milk         | 2014    | mastitis       | 10   | 13 | 16 | WFB00000000  | 296 |
| 194787    | 584 | bovine | Israel | milk         | 2014    | mastitis       | 140  | 49 | 33 | WFB00000000  | 297 |
| 196966    | 585 | bovine | Israel | milk         | 2014    | mastitis       | 140  | 49 | 33 | WFB00000000  | 298 |
| 200215    | 586 | bovine | Israel | milk         | 2014    | mastitis       | NT8  | 47 | 29 | WFB00000000  | 299 |
| 207520    | 587 | bovine | Israel | milk         | 2014    | mastitis       | 140  | 49 | 33 | WFB00000000  | 300 |
| 209716    | 588 | bovine | Israel | milk         | 2014    | mastitis       | 10   | 25 | 52 | WFB00000000  | 301 |
| 215948    | 589 | bovine | Israel | milk         | 2014    | mastitis       | 5    | 8  | 21 | WFB00000000  | 302 |
| 216555    | 590 | bovine | Israel | milk         | 2014    | mastitis       | NT10 | 13 | 18 | WFB00000000  | 303 |
| 220642    | 591 | bovine | Israel | milk         | 2015    | mastitis       | 10   | 25 | 52 | WFB00000000  | 304 |
| 219047    | 592 | bovine | Israel | milk         | 2015    | mastitis       | 140  | 49 | 33 | WFB00000000  | 305 |
| 222991    | 593 | bovine | Israel | milk         | 2015    | mastitis       | 10   | 25 | 52 | WFB00000000  | 306 |
| 224709    | 594 | bovine | Israel | milk         | 2015    | mastitis       | NT8  | 47 | 29 | WFB00000000  | 307 |
| 227457    | 595 | bovine | Israel | milk         | 2015    | mastitis       | 10   | 25 | 52 | WFB00000000  | 308 |
| 227456    | 596 | bovine | Israel | milk         | 2015    | mastitis       | 10   | 25 | 52 | WFB00000000  | 309 |
| 227455    | 597 | bovine | Israel | milk         | 2015    | mastitis       | 10   | 25 | 52 | WFB00000000  | 310 |
| 227465    | 598 | bovine | Israel | milk         | 2015    | mastitis       | 10   | 25 | 52 | WFB00000000  | 311 |
| 227462    | 599 | bovine | Israel | milk         | 2015    | mastitis       | 5    | 8  | 21 | WFB00000000  | 312 |
| 228404    | 600 | bovine | Israel | milk         | 2015    | mastitis       | 10   | 25 | 52 | WFB00000000  | 313 |
| 241741    | 601 | bovine | Israel | milk         | 2015    | mastitis       | 141  | 25 | 58 | WFB00000000  | 314 |
| 242384    | 602 | bovine | Israel | milk         | 2015    | mastitis       | 140  | 51 | 33 | WFB00000000  | 315 |
| 256832    | 604 | bovine | Israel | milk         | 2016    | mastitis       | 27   | 52 | 26 | WFB00000000  | 316 |
| 261002    | 605 | bovine | Israel | milk         | 2016    | mastitis       | 140  | 49 | 33 | WFB00000000  | 317 |
| 254410    | 606 | bovine | Israel | milk         | 2016    | mastitis       | 10   | 25 | 52 | WFB00000000  | 318 |
| 280413    | 609 | bovine | Israel | milk         | 2016    | mastitis       | 10   | 25 | 52 | WFB00000000  | 319 |
| 290360    | 610 | bovine | Israel | milk         | 2017    | mastitis       | 10   | 53 | 52 | WFB00000000  | 320 |
| 290363    | 611 | bovine | Israel | milk         | 2017    | mastitis       | NT8  | 47 | 29 | WFB00000000  | 321 |
| 291066    | 612 | bovine | Israel | milk         | 2017    | mastitis       | 142  | 50 | 5  | WFB00000000  | 322 |
| 290372    | 613 | bovine | Israel | milk         | 2017    | mastitis       | NT11 | 47 | 31 | WFB00000000  | 323 |
| 290364    | 614 | bovine | Israel | milk         | 2017    | mastitis       | NT12 | 54 | 86 | WFB00000000  | 324 |
| 294301    | 615 | bovine | Israel | milk         | 2017    | mastitis       | NT12 | 54 | 86 | WFB00000000  | 325 |
| 294298    | 616 | bovine | Israel | milk         | 2017    | mastitis       | NT13 | 55 | 38 | WFB00000000  | 326 |
| 14        | 619 | bovine | Israel | semen        | unknown | healthy        | 143  | 43 | 10 | WFB00000000  | 327 |
| 8         | 620 | bovine | Israel | semen        | 2005    | healthy        | 143  | 43 | 10 | WFB00000000  | 328 |
| 9         | 621 | bovine | Israel | semen        | 2004    | healthy        | 143  | 43 | 10 | WFB00000000  | 329 |
| 3         | 622 | bovine | Israel | semen        | 2001    | healthy        | 143  | 43 | 10 | WFB00000000  | 330 |
| 8168      | 673 | bovine | Israel | lung         | 2006    | pneumonia      | 137  | 62 | 82 | WFB00000000  | 331 |
| 7245      | 674 | bovine | Israel | lung         | 2006    | pneumonia      | 14   | 43 | 7  | WFB00000000  | 332 |
| 9771      | 675 | bovine | Israel | lung         | 2006    | pneumonia      | 14   | 43 | 7  | WFB00000000  | 333 |
| 9470      | 676 | bovine | Israel | lung         | 2006    | pneumonia      | 137  | 63 | 82 | WFB00000000  | 334 |
| 3181      | 677 | bovine | Israel | lung         | 2006    | pneumonia      | 14   | 43 | 7  | WFB00000000  | 335 |
| 6226      | 678 | bovine | Israel | nasal cavity | 2006    | healthy        | 14   | 43 | 7  | WFB00000000  | 336 |
| 8395      | 679 | bovine | Israel | lung         | 2006    | pneumonia      | 181  | 64 | 37 | WFB00000000  | 337 |
| 5180      | 680 | bovine | Israel | lung         | 2006    | pneumonia      | 10   | 65 | 52 | WFB00000000  | 338 |
| 1972      | 681 | bovine | Israel | lung         | 2007    | pneumonia      | 14   | 43 | 7  | WFB00000000  | 339 |
| 6656      | 682 | bovine | Israel | lung         | 2008    | pneumonia      | 14   | 43 | 7  | WFB00000000  | 340 |
| 5028      | 683 | bovine | Israel | lung         | 2008    | pneumonia      | 10   | 25 | 52 | WFB00000000  | 341 |
| 18525     | 684 | bovine | Israel | lung         | 2008    | pneumonia      | 10   | 25 | 52 | WFB00000000  | 342 |
| 70262-1   | 685 | bovine | Israel | vulva        | 2010    | vulvitis       | 10   | 25 | 52 | WFB00000000  | 343 |
| 72211     | 686 | bovine | Israel | vulva        | 2010    | vulvitis       | 10   | 25 | 52 | WFB00000000  | 344 |
| 168689    | 687 | bovine | Israel | fetal tissue | 2013    | abortion       | 146  | 8  | 35 | WFB00000000  | 345 |
| 219363    | 688 | bovine | Israel | lung         | 2015    | pneumonia      | 10   | 25 | 52 | WFB00000000  | 346 |
| 227285    | 689 | bovine | Israel | lung         | 2015    | pneumonia      | 42   | 50 | 6  | WFB00000000  | 347 |
| 245810    | 690 | bovine | Israel | lung         | 2015    | pneumonia      | 147  | 66 | 85 | WFB00000000  | 348 |
| 267780    | 691 | bovine | Israel | lung         | 2016    | pneumonia      | 148  | 67 | 4  | WFB00000000  | 349 |
| 268681    | 692 | bovine | Israel | eye          | 2016    | conjunctivitis | NT6  | 25 | 52 | WFB00000000  | 350 |
| 270940    | 693 | bovine | Israel | lung         | 2016    | pneumonia      | NT6  | 25 | 52 | WFB00000000  | 351 |

|                 |      |                   |                        |                       |                        |      |                                                   |      |    |    |               |     |
|-----------------|------|-------------------|------------------------|-----------------------|------------------------|------|---------------------------------------------------|------|----|----|---------------|-----|
| 270649          | 694  | bovine            | Israel                 |                       | lung                   | 2016 | pneumonia                                         | 5    | 68 | 21 | WFFT00000000  | 352 |
| 259488          | 695  | bovine            | Israel                 |                       | lung                   | 2016 | pneumonia                                         | 149  | 66 | 84 | WFFU00000000  | 353 |
| 286093-1        | 696  | bovine            | Israel                 |                       | larynx                 | 2017 | pneumonia                                         | NT16 | 61 | 28 | WFFV00000000  | 354 |
| 287942          | 697  | bovine            | Israel                 |                       | lung                   | 2017 | pneumonia                                         | 10   | 25 | 52 | WFFW00000000  | 355 |
| 290634          | 698  | bovine            | Israel                 |                       | lung                   | 2017 | pneumonia                                         | 42   | 50 | 6  | WFFX00000000  | 356 |
| 2A              | 639  | bovine            | Australia <sup>b</sup> |                       | pharynx                | 2006 | pneumonia                                         | 10   | 25 | 52 | WFDV00000000  | 357 |
| H               | 640  | bovine            | Australia <sup>b</sup> |                       | joint                  | 2006 | arthritis                                         | 10   | 25 | 52 | WFDW00000000  | 358 |
| 2D              | 641  | bovine            | Australia <sup>b</sup> |                       | pharynx                | 2006 | pneumonia                                         | 10   | 25 | 52 | WFDX00000000  | 359 |
| 1254            | 642  | bovine            | Australia <sup>b</sup> |                       | lung                   | 2006 | pneumonia                                         | 10   | 25 | 52 | WFDY00000000  | 360 |
| 261552          | 643  | bovine            | Australia <sup>b</sup> |                       | lung                   | 2016 | pneumonia                                         | NT6  | 53 | 52 | WFDZ00000000  | 361 |
| 41569           | 644  | bovine            | Australia <sup>b</sup> |                       | lung                   | 2009 | pneumonia                                         | 10   | 25 | 52 | WFEA00000000  | 362 |
| 2583            | 645  | bovine            | Australia <sup>b</sup> |                       | larynx                 | 2009 | pneumonia                                         | 10   | 25 | 52 | WFEB00000000  | 363 |
| <b>63307</b>    | 99   | bovine            | Australia <sup>b</sup> |                       | lung                   | 2010 | pneumonia                                         | 10   | 25 | 52 | WFEC00000000  | 364 |
| 261553-9503     | 647  | bovine            | Australia <sup>b</sup> |                       | joint                  | 2016 | arthritis                                         | 10   | 25 | 52 | WFED00000000  | 365 |
| 261553-9655     | 648  | bovine            | Australia <sup>b</sup> |                       | joint                  | 2016 | arthritis                                         | 10   | 25 | 52 | WFEE00000000  | 366 |
| 261552-3688     | 649  | bovine            | Australia <sup>b</sup> |                       | lung                   | 2016 | pneumonia                                         | NT6  | 25 | 52 | WFEF00000000  | 367 |
| 261552-2741     | 650  | bovine            | Australia <sup>b</sup> |                       | lung                   | 2016 | pneumonia                                         | 10   | 53 | 52 | WFEG00000000  | 368 |
| <b>NADC1</b>    | 1    | bison             | United States          | Montana               | lung                   | 2011 | pneumonia                                         | 1    | 25 | 51 | PCR amplicons | 1   |
| <b>NADC5</b>    | 36   | bison             | United States          | Montana               | lung                   | 2011 | pneumonia                                         | 1    | 25 | 51 | 348           | 2   |
| <b>NADC51</b>   | 929  | bison             | United States          | Montana               | lung                   | 2015 | unknown                                           | 46   | 30 | 69 | 1360          | 3   |
| <b>NADC32</b>   | 55   | bison             | United States          | Nebraska              | uterus                 | 2012 | unknown                                           | 1    | 25 | 51 | 365           | 4   |
| <b>NADC15</b>   | 46   | bison             | United States          | North Dakota          | lung                   | 2007 | pneumonia                                         | 1    | 25 | 51 | 352           | 5   |
| <b>NADC28</b>   | 54   | bison             | United States          | South Dakota          | pharynx                | 2012 | pharyngitis, pneumonia                            | 2    | 25 | 62 | 276           | 6   |
| <b>NADC30</b>   | 3    | bison             | United States          | South Dakota          | lung                   | 2012 | pneumonia                                         | 2    | 25 | 62 | 479           | 7   |
| <b>NADC53</b>   | 308  | bison             | United States          | South Dakota          | lung                   | 2015 | pneumonia                                         | 133  | 29 | 30 | 774           | 8   |
| <b>NADC44</b>   | 389  | bison             | United States          | Nebraska/South Dakota | lung, no lesions noted | 2012 | lameness                                          | 5    | 8  | 21 | 311           | 9   |
| <b>NADC45</b>   | 67   | bison             | United States          | Oklahoma              | lung                   | 2014 | pneumonia                                         | 4    | 6  | 25 | 338           | 10  |
| <b>NADC50</b>   | 390  | bison             | United States          | Oklahoma              | nasal cavity           | 2014 | healthy                                           | 4    | 6  | 25 | 329           | 11  |
| <b>NADC72-1</b> | 530  | bison             | United States          | Iowa                  | nasal cavity           | 2012 | healthy                                           | 1    | 25 | 51 | 1206          | 12  |
| <b>NADC73-1</b> | 932  | bison             | United States          | Iowa                  | nasal cavity           | 2012 | healthy                                           | 1    | 25 | 51 | 89            | 13  |
| <b>NADC74-1</b> | 935  | bison             | United States          | Iowa                  | nasal cavity           | 2012 | healthy                                           | 1    | 25 | 51 | 155           | 14  |
| <b>NADC75-1</b> | 938  | bison             | United States          | Iowa                  | nasal cavity           | 2012 | healthy                                           | 1    | 25 | 51 | 68            | 15  |
| <b>NADC76-1</b> | 941  | bison             | United States          | Iowa                  | nasal cavity           | 2012 | healthy                                           | 1    | 25 | 51 | 68            | 16  |
| <b>NADC77-1</b> | 944  | bison             | United States          | Iowa                  | nasal cavity           | 2012 | healthy                                           | 1    | 25 | 51 | 44            | 17  |
| <b>NADC78-1</b> | 947  | bison             | United States          | Iowa                  | nasal cavity           | 2012 | healthy                                           | 1    | 25 | 51 | 64            | 18  |
| <b>NADC83-1</b> | 765  | bison             | United States          | Iowa                  | lung                   | 2016 | bronchitis, pleuropneumonia                       | 136  | 33 | 34 | 1075          | 19  |
| <b>MJ5</b>      | 391  | bison             | Canada                 | Alberta               | lung                   | 2015 | pneumonia                                         | 2    | 25 | 62 | 437           | 20  |
| <b>MJ9</b>      | 395  | bison             | Canada                 | Alberta               | lung                   | 2015 | pneumonia                                         | 2    | 25 | 62 | 342           | 21  |
| <b>MJ8</b>      | 394  | bison             | Canada                 | Alberta               | lung                   | 2015 | septicemia due to <i>Arcanobacterium pyogenes</i> | 2    | 25 | 62 | 220           | 22  |
| <b>NADC18</b>   | 49   | bison             | Canada                 | Alberta               | lung of aborted fetus  | 2012 | abortion                                          | 2    | 25 | 62 | 579           |     |
| <b>NADC24</b>   | 52   | bison             | Canada                 | Alberta               | placenta               | 2012 | abortion, pneumonia                               | 2    | 25 | 62 | 211           | 23  |
| NADC65          | 1098 | bison             | Canada                 | Alberta               | joint                  | 2013 | pneumonia, arthritis                              | 2    | 25 | 62 | 102           | 24  |
| NADC66          | 1099 | bison             | Canada                 | Alberta               | lung                   | 2013 | pneumonia                                         | NT3  | 39 | 62 | 99            | 25  |
| NADC69          | 1100 | bison             | Canada                 | Alberta               | joint                  | 2013 | pneumonia                                         | 2    | 25 | 62 | 102           | 26  |
| <b>NADC81-1</b> | 764  | bison             | Canada                 | Alberta               | nasal cavity           | 2017 | healthy                                           | 135  | 38 | 50 | 1264          | 27  |
| <b>NADC82-1</b> | 966  | bison             | Canada                 | Alberta               | nasal cavity           | 2017 | healthy                                           | 135  | 38 | 50 | 61            | 28  |
| <b>NADC98-1</b> | 955  | bison             | Canada                 | Alberta               | pharynx                | 2017 | pharyngitis                                       | 57   | 20 | 43 | 115           | 29  |
| <b>MJ6</b>      | 392  | bison             | Canada                 | Saskatchewan          | lung                   | 2015 | pneumonia                                         | 2    | 25 | 62 | 381           | 30  |
| <b>MJ7</b>      | 393  | bison             | Canada                 | Saskatchewan          | lung                   | 2015 | pneumonia                                         | 2    | 25 | 62 | 379           | 31  |
| <b>MJ10</b>     | 396  | bison             | Canada                 | Saskatchewan          | lung                   | 2015 | pneumonia                                         | 2    | 25 | 62 | 331           | 32  |
| NADC60          | 1097 | bison             | Canada                 | Saskatchewan          | lung                   | 2012 | pneumonia                                         | 2    | 25 | 62 | 107           | 33  |
| <b>NADC35</b>   | 58   | bison             | Canada                 | Manitoba              | lung                   | 2012 | pneumonia                                         | 2    | 32 | 74 | PCR amplicons | 34  |
| KRB1            | 386  | mule deer         | United States          | Nevada                | lung                   | 2012 | pneumonia, otitis                                 | NT5  | 20 | 43 | 561           | 1   |
| <b>KRB8</b>     | 388  | white-tailed deer | United States          | Minnesota             | lung                   | 2014 | pneumonia                                         | 3    | 5  | 23 | 197           | 1   |
| 8790            | 1013 | goat              | Ethiopia               | Harargue              | unknown                | 1987 | unknown                                           | 180  | 76 | 88 | LAUS01        | 1   |

<sup>a</sup> Isolates in bold font are those for which STs based on the method of Register *et. al.* (1) were previously reported (1, 2, 3). Isolates obtained from the same animal are shaded similarly

<sup>b</sup>Animals of origin were being imported to Israel from the country indicated at the time they were cultured for *M. bovis*. Samples from which isolates were obtained were collected in Israel in quarantine stations or, for animals that died during transport, at the Kimron Veterinary Institute.

**Table S2.** MLST profile definitions used for the Weybridge scheme<sup>a</sup>

| ST | atpA | dnaA | metS | recA | rpoD | tkf | tufA |
|----|------|------|------|------|------|-----|------|
| 1  | A    | A    | A    | A    | A    | A   | A    |
| 2  | A    | A    | B    | A    | B    | G   | E    |
| 3  | A    | A    | E    | A    | B    | G   | F    |
| 4  | A    | B    | E    | A    | B    | G   | F    |
| 5  | B    | A    | B    | A    | D    | E   | E    |
| 6  | C    | A    | B    | A    | D    | E   | E    |
| 7  | C    | A    | B    | A    | D    | H   | A    |
| 8  | C    | A    | B    | A    | D    | I   | E    |
| 9  | C    | A    | B    | A    | D    | J   | E    |
| 10 | C    | A    | B    | A    | E    | E   | C    |
| 11 | C    | A    | B    | B    | D    | E   | E    |
| 12 | C    | A    | B    | D    | D    | E   | E    |
| 13 | C    | A    | E    | D    | D    | E   | E    |
| 14 | C    | A    | E    | D    | D    | I   | E    |
| 15 | C    | A    | F    | D    | D    | E   | E    |
| 16 | C    | C    | B    | D    | D    | I   | E    |
| 17 | C    | E    | B    | D    | D    | E   | G    |
| 18 | C    | C    | C    | D    | D    | I   | E    |
| 19 | B    | A    | B    | A    | E    | H   | A    |
| 20 | C    | D    | E    | D    | D    | E   | E    |
| 21 | N    | E    | B    | D    | D    | B   | D    |
| 22 | C    | E    | B    | A    | E    | E   | E    |
| 23 | C    | E    | B    | D    | D    | E   | E    |
| 24 | C    | E    | E    | A    | D    | E   | E    |
| 25 | C    | E    | E    | D    | D    | E   | E    |
| 26 | C    | E    | E    | D    | D    | F   | E    |
| 27 | C    | E    | E    | D    | D    | I   | E    |
| 28 | C    | E    | B    | D    | D    | C   | E    |
| 29 | F    | A    | B    | D    | D    | E   | E    |
| 30 | C    | E    | B    | A    | D    | B   | E    |
| 31 | C    | E    | H    | D    | D    | E   | E    |
| 32 | C    | F    | E    | D    | D    | E   | E    |
| 33 | B    | A    | E    | A    | E    | E   | E    |
| 34 | C    | G    | E    | D    | D    | E   | E    |
| 35 | C    | H    | E    | A    | D    | E   | E    |
| 36 | D    | E    | B    | A    | D    | B   | D    |
| 37 | E    | G    | D    | A    | D    | B   | B    |
| 38 | C    | E    | B    | D    | D    | I   | E    |
| 39 | G    | E    | E    | D    | D    | E   | E    |

|    |   |   |   |   |   |   |   |
|----|---|---|---|---|---|---|---|
| 40 | A | A | A | A | F | A | A |
| 41 | I | I | L | E | G | M | I |
| 42 | K | J | K | F | H | K | H |
| 43 | H | A | F | A | B | H | A |
| 44 | C | I | E | D | G | E | E |
| 45 | C | E | E | C | D | E | E |
| 46 | C | E | J | E | D | L | E |
| 47 | C | A | F | A | D | H | E |
| 48 | C | E | B | A | D | E | E |
| 49 | J | A | E | D | D | E | J |
| 50 | C | A | I | A | B | A | A |
| 51 | L | A | E | D | D | E | J |
| 52 | C | A | B | A | C | H | E |
| 53 | C | E | E | D | I | E | E |
| 54 | C | K | E | E | J | E | E |
| 55 | C | A | E | E | J | E | J |
| 56 | C | E | B | D | D | B | E |
| 57 | C | E | E | D | D | D | E |
| 58 | H | A | I | A | B | A | A |
| 59 | C | A | B | A | D | A | A |
| 60 | C | A | B | A | D | H | E |
| 61 | H | A | B | A | D | H | E |
| 62 | I | I | M | A | G | M | I |
| 63 | I | I | M | E | G | M | I |
| 64 | J | A | N | A | J | M | J |
| 65 | C | E | E | D | D | E | A |
| 66 | J | K | F | E | J | H | J |
| 67 | A | A | O | A | D | G | F |
| 68 | M | A | B | A | D | I | E |
| 69 | A | E | P | D | D | E | F |
| 70 | N | E | E | D | D | E | E |
| 71 | A | A | E | A | D | G | E |
| 72 | A | A | B | A | D | I | A |
| 73 | A | A | G | A | A | A | A |
| 74 | C | A | B | A | D | I | K |
| 75 | C | L | E | D | D | E | E |
| 76 | O | M | Q | G | K | N | L |
| 77 | C | A | E | D | D | E | A |

<sup>a</sup> Allelic profiles indicated for the numerical ST designations used here do not correspond to those used for the same numerical ST designations reported in Rosales *et al.* (4).

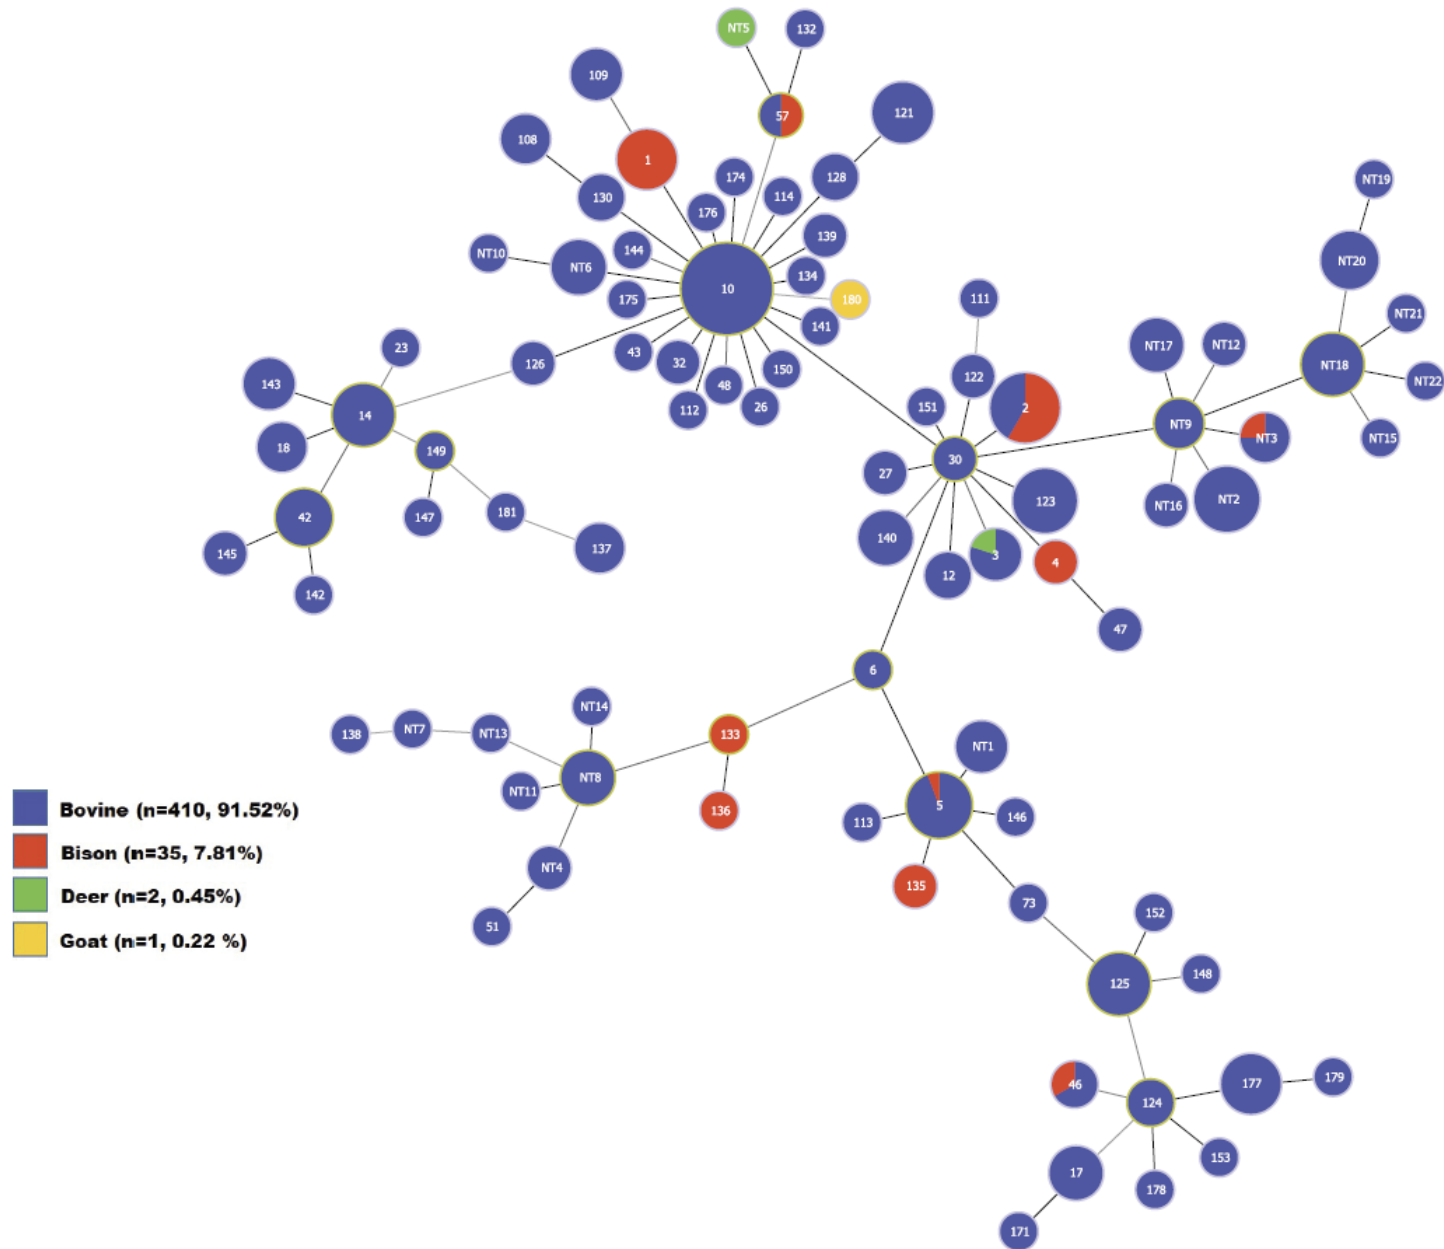

Fig. S1. Minimum spanning tree depicting evolutionary relationships among the 91 STs defined by the original PubMLST scheme for *M. bovis* found among the 448 isolates included in this study. STs are indicated by the numeral in each circle. Circles, or portions thereof, are sized in proportion to the number of isolates with the indicated ST (log scale) and colored to indicate the host(s) in which each ST was found, as specified in the color key.



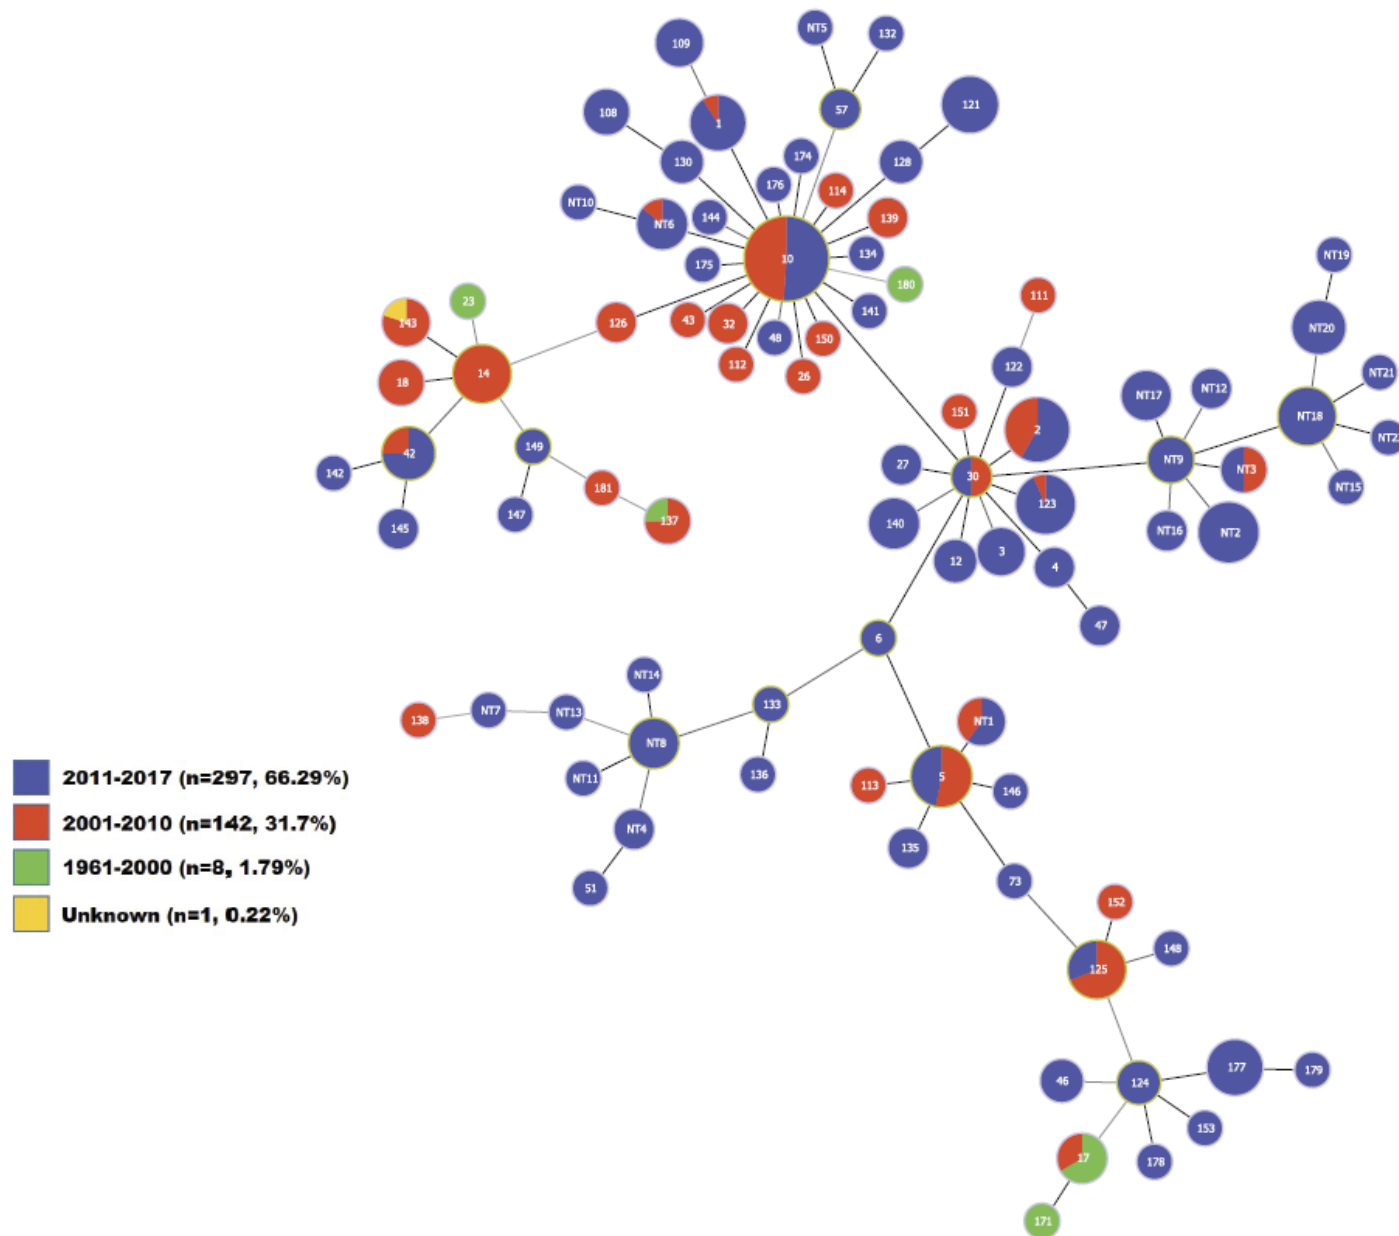

Fig. S2. Minimum spanning tree depicting evolutionary relationships among the 91 STs defined by the original PubMLST scheme for *M. bovis* found among the 448 isolates included in this study. STs are indicated by the numeral in each circle. Circles, or portions thereof, are sized in proportion to the number of isolates with the indicated ST (log scale) and are colored in accordance with the year of isolation, as specified in the color key.

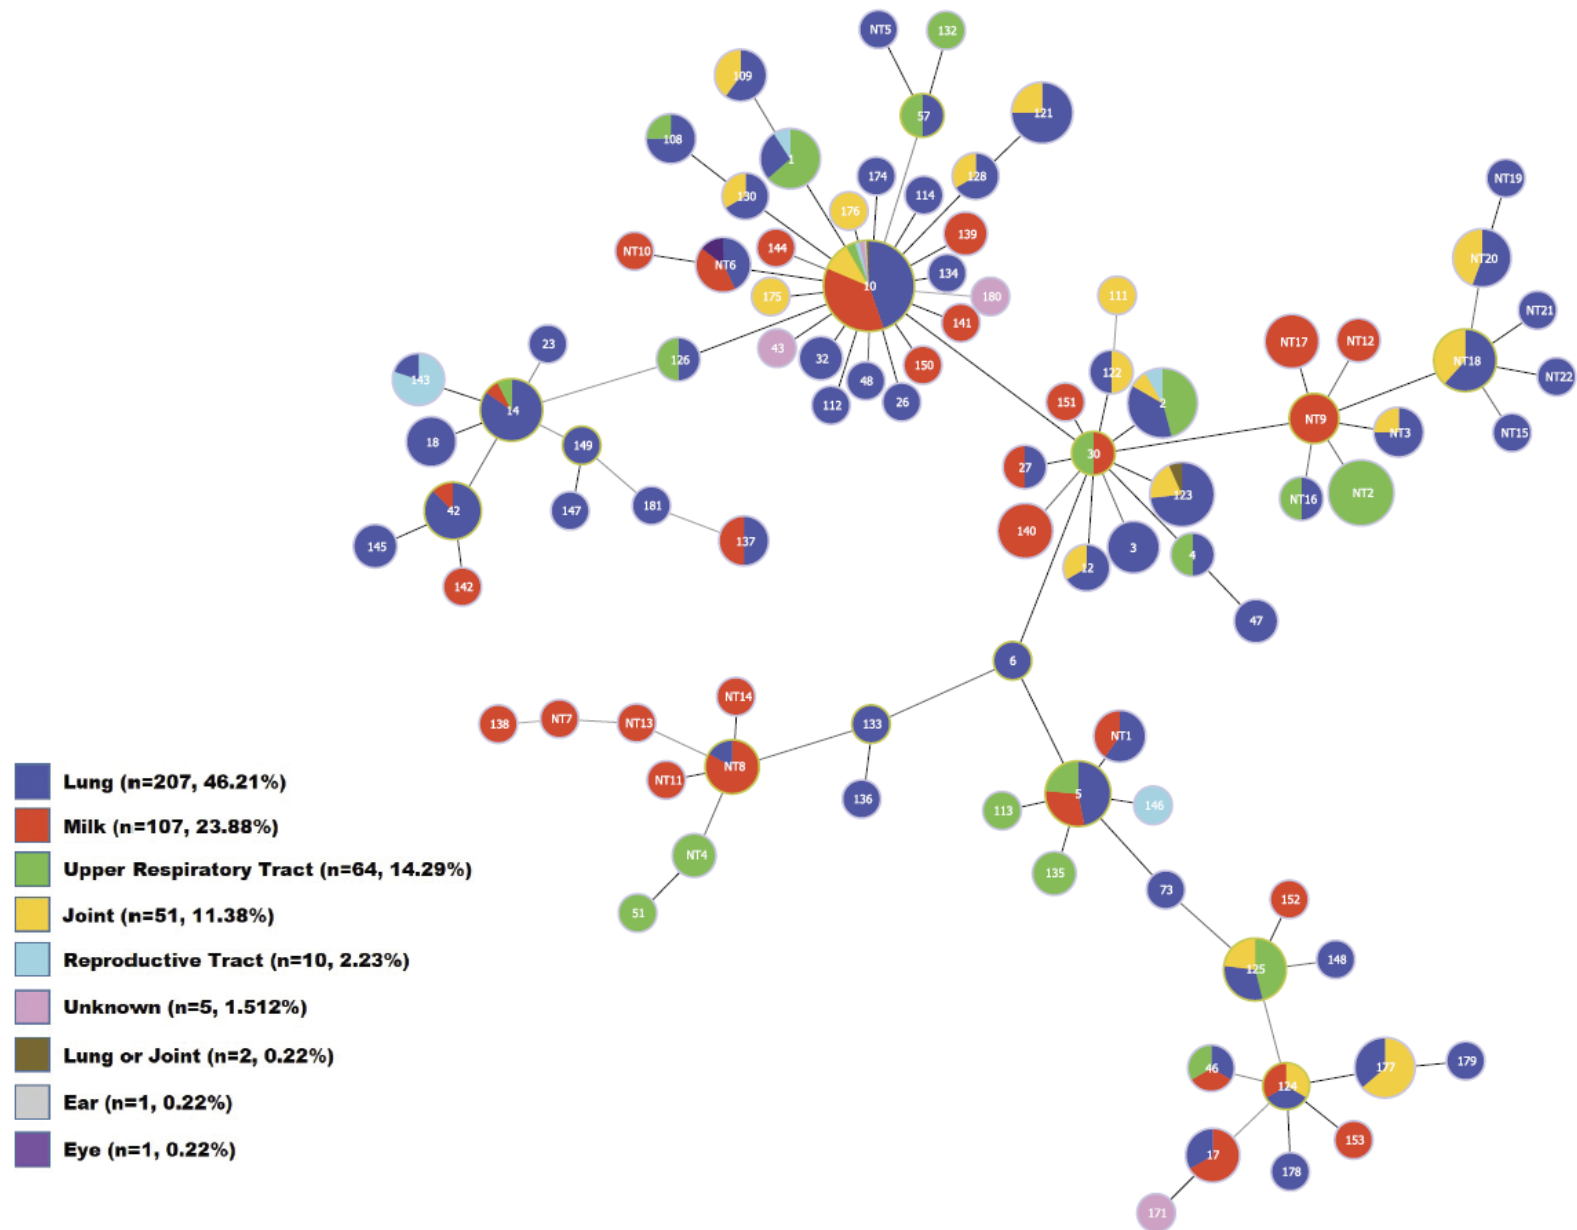

Fig. S3. Minimum spanning tree depicting evolutionary relationships among the 91 STs defined by the original PubMLST scheme for *M. bovis* found among the 448 isolates included in this study. STs are indicated by the numeral in each circle. Circles, or portions thereof, are sized in proportion to the number of isolates with the indicated ST (log scale) and colored in accordance with the anatomic site of origin, as specified in the color key.

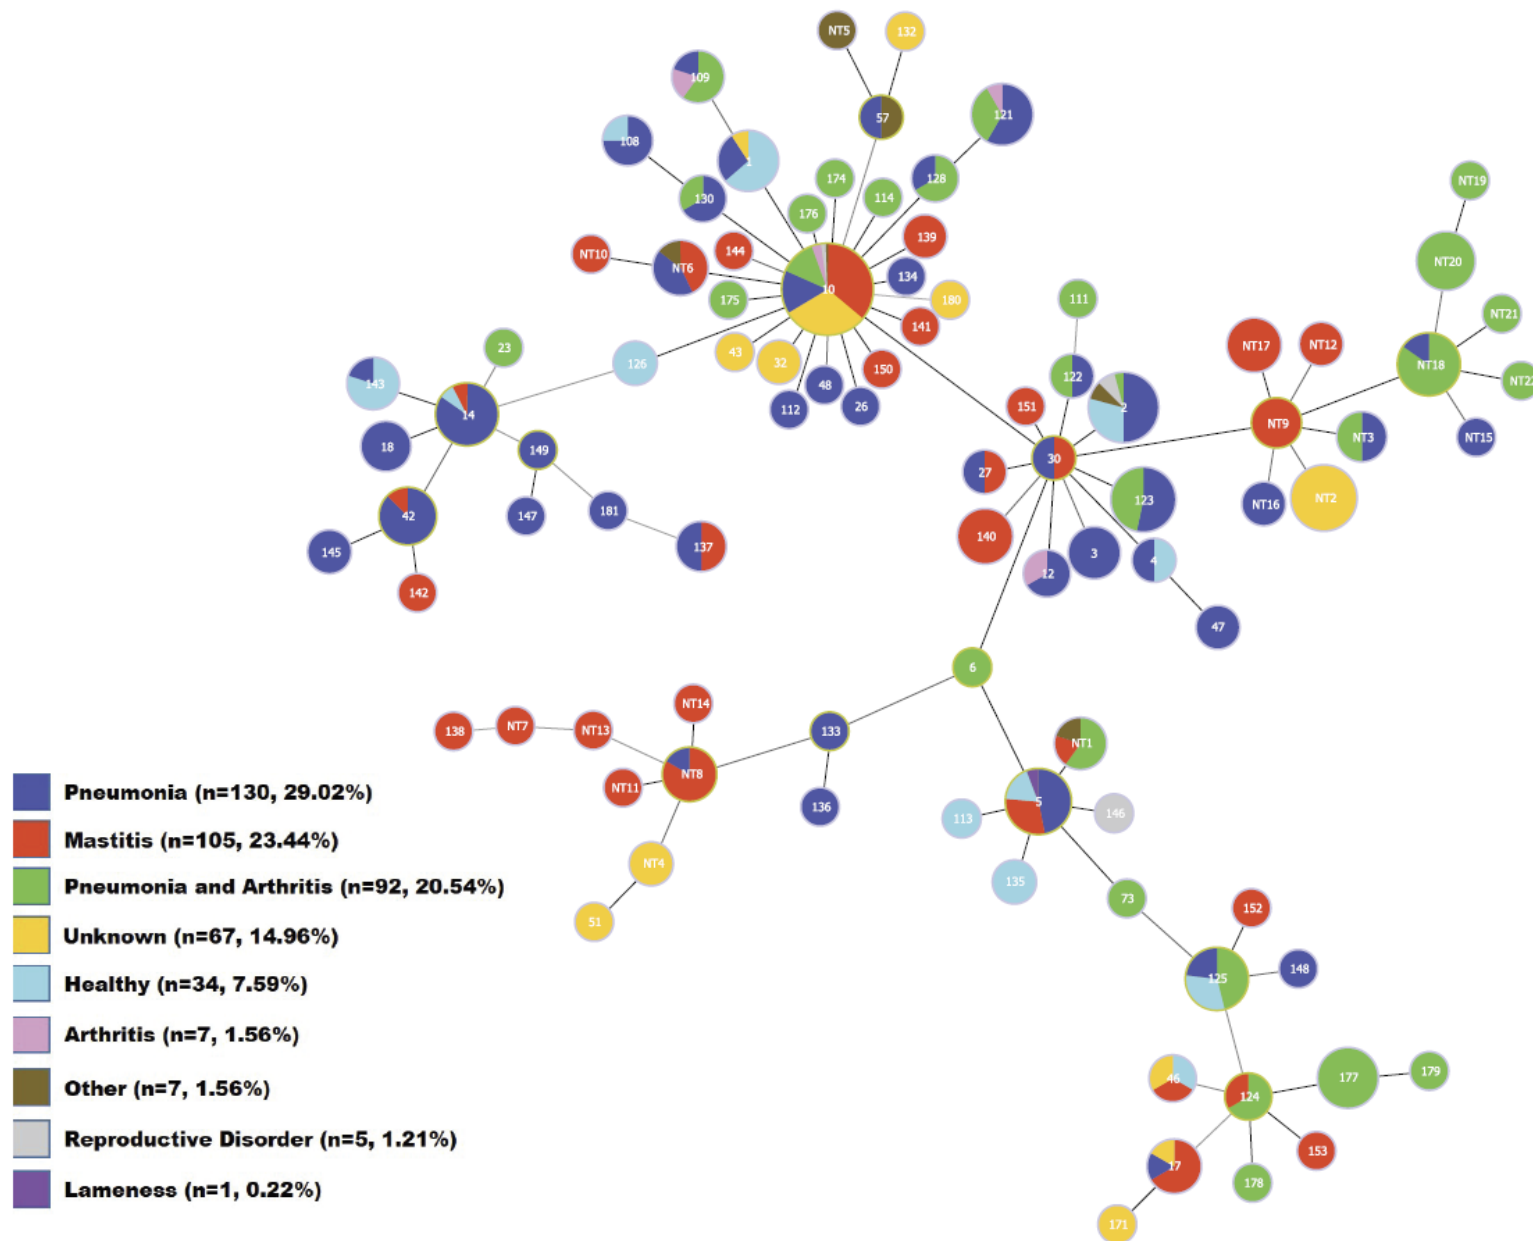

Fig. S4. Minimum spanning tree depicting evolutionary relationships among the 91 STs defined by the original PubMLST scheme for *M. bovis* found among the 448 isolates included in this study. STs are indicated by the numeral in each circle. Circles, or portions thereof, are sized in proportion to the number of isolates with the indicated ST (log scale) and colored in accordance with the clinical status of the animal of origin, as specified in the color key.

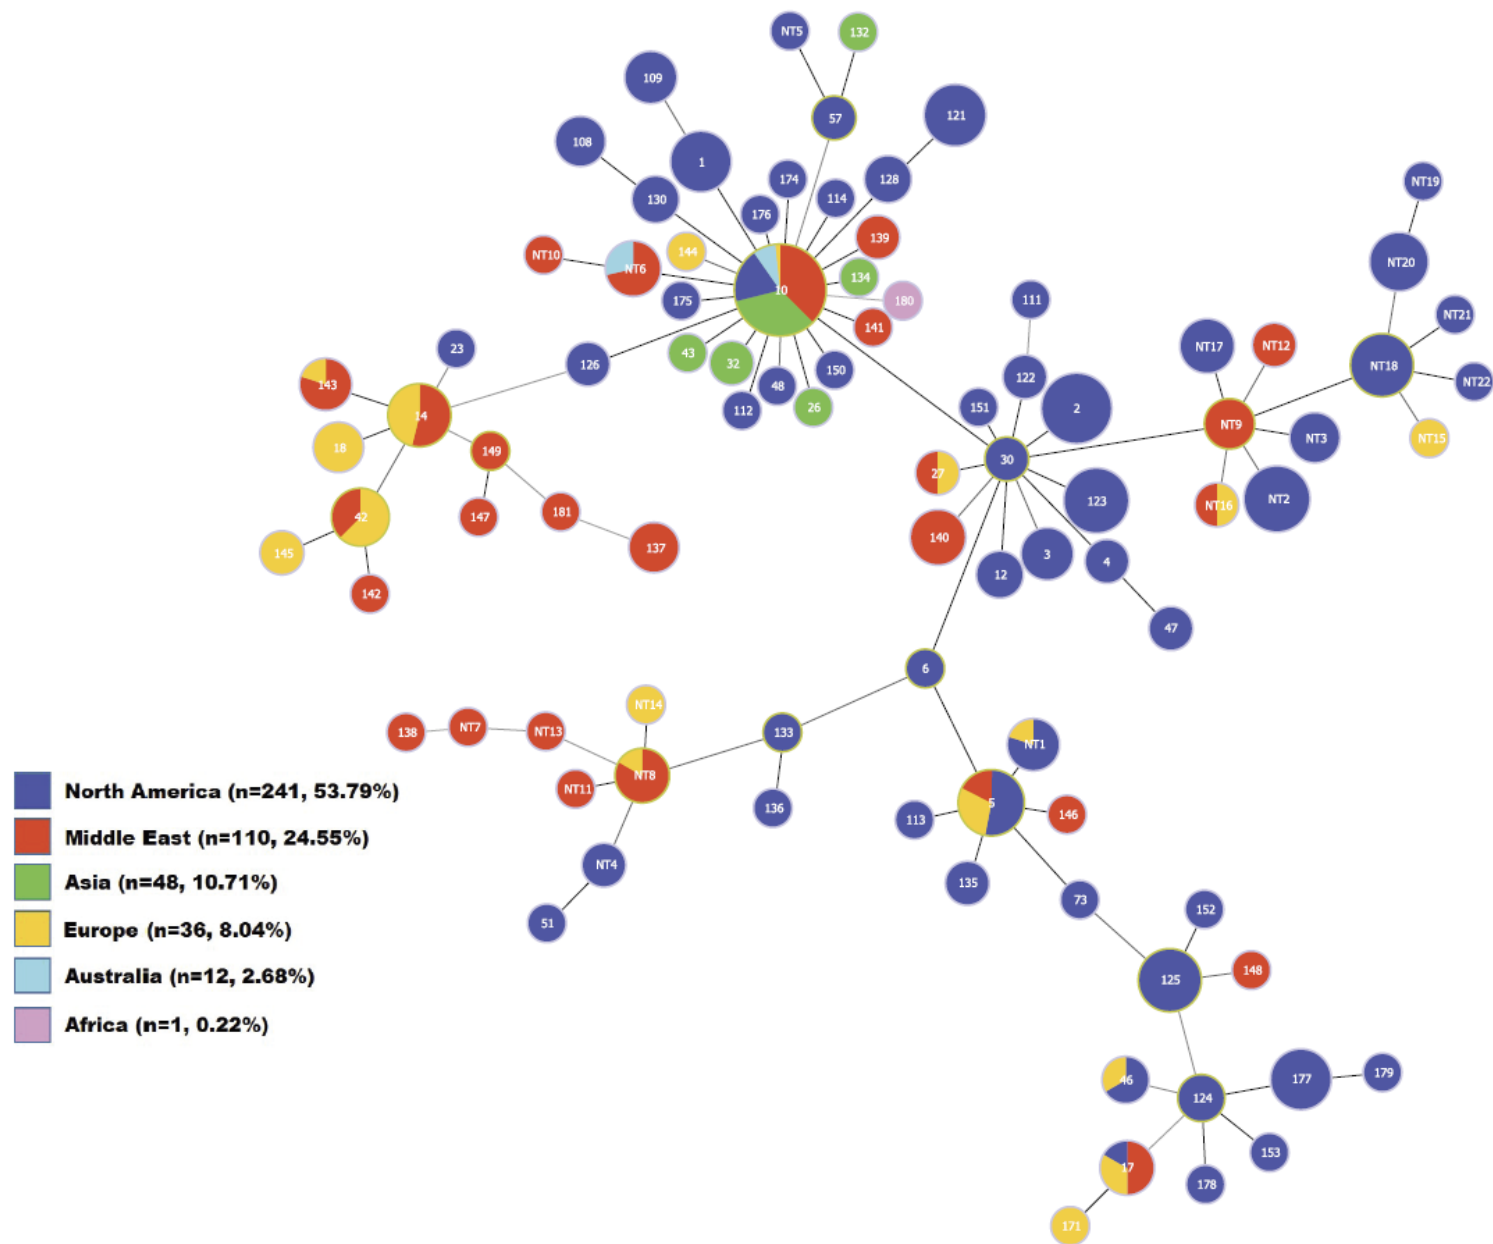

Fig. S5. Minimum spanning tree depicting evolutionary relationships among the 91 STs defined by the original PubMLST scheme for *M. bovis* found among the 448 isolates included in this study. STs are indicated by the numeral in each circle. Circles, or portions thereof, are sized in proportion to the number of isolates with the indicated ST (log scale) and colored in accordance with the geographic origin, as specified in the color key.

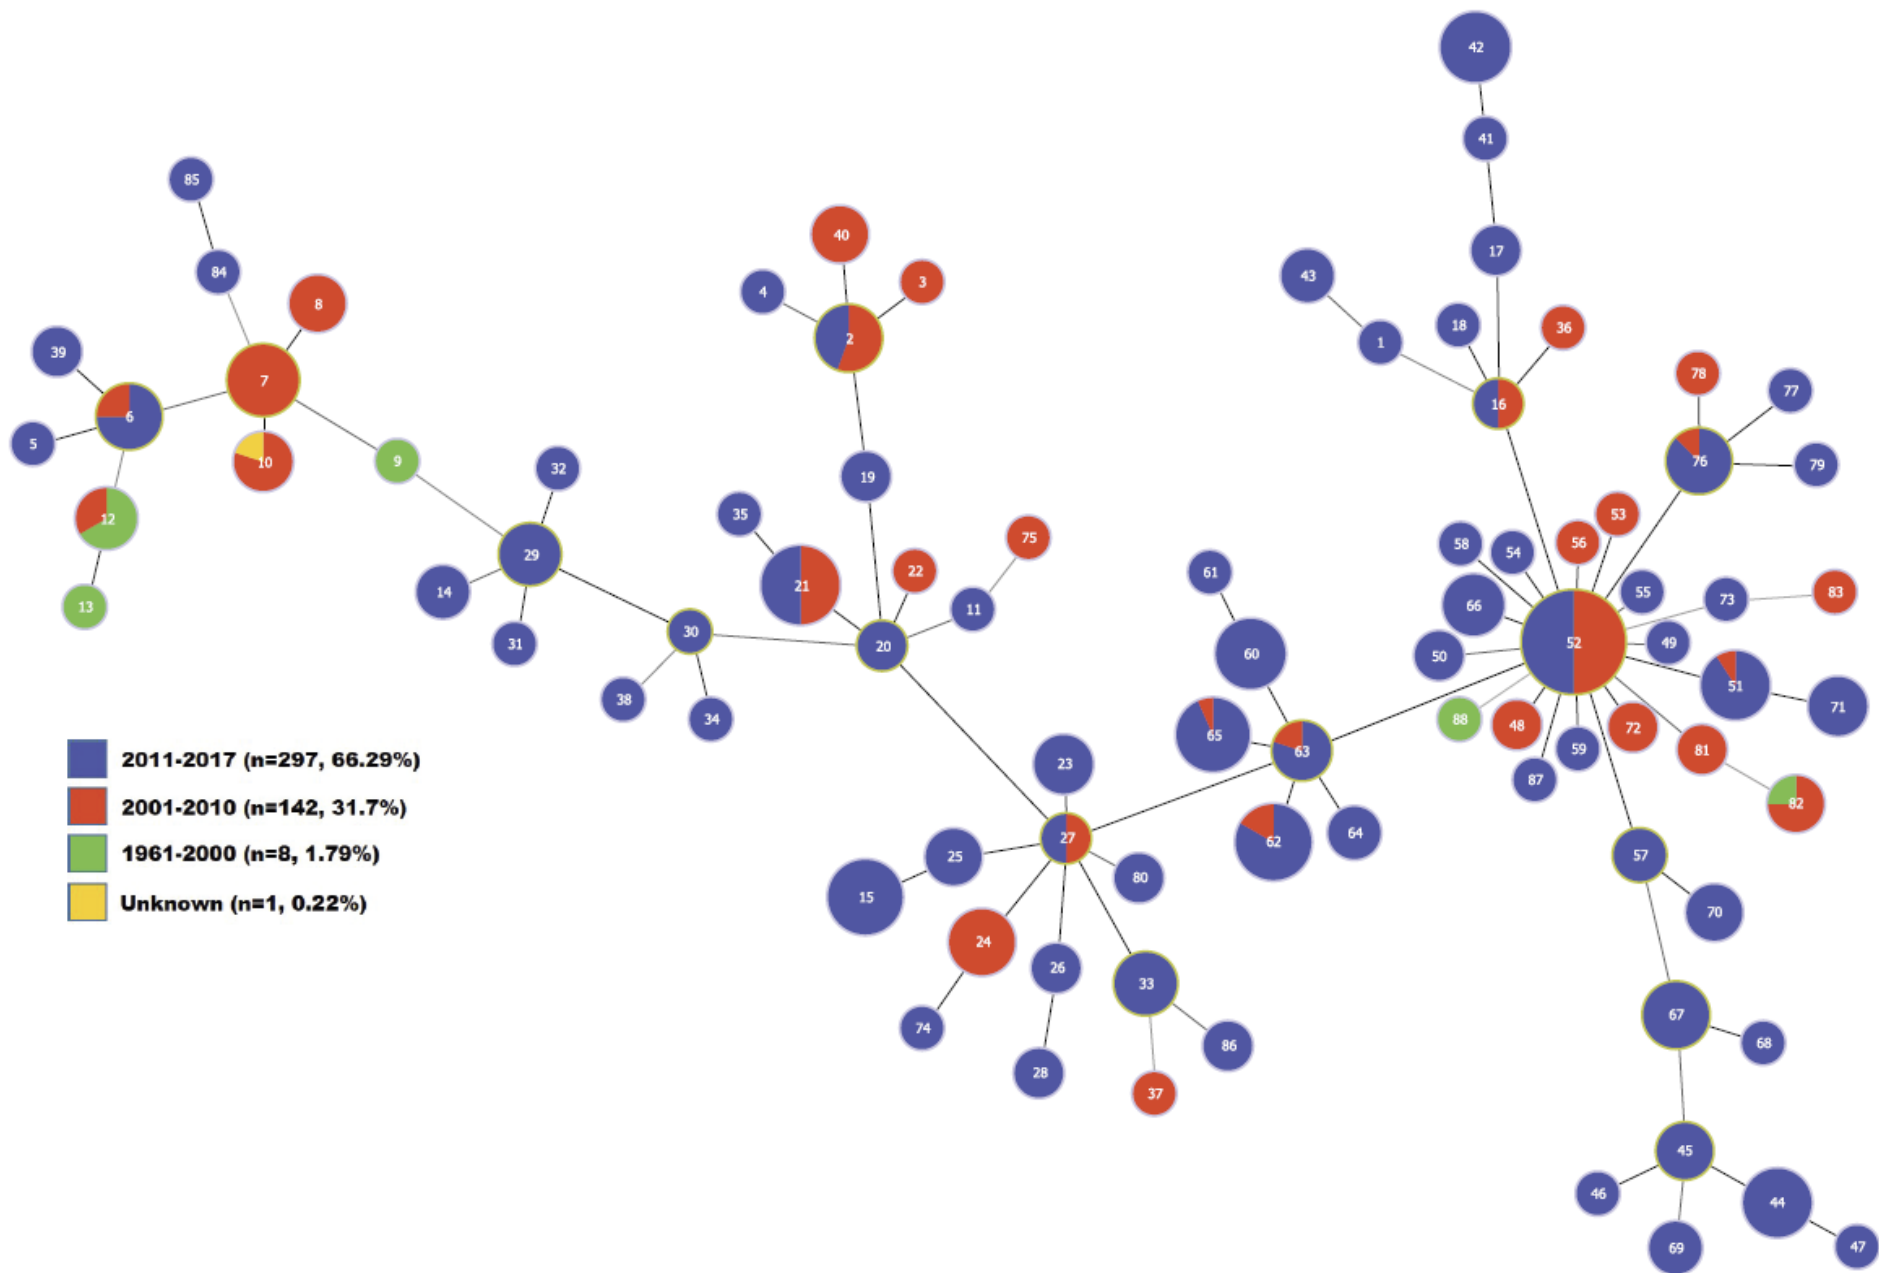

Fig. S6. Minimum spanning tree depicting evolutionary relationships among the 88 STs defined by the revised PubMLST scheme for *M. bovis* found among the 448 isolates included in this study. STs are indicated by the numeral in each circle. Circles, or portions thereof, are sized in proportion to the number of isolates with the indicated ST (log scale) and colored in accordance with the year of isolation, as specified in the color key.

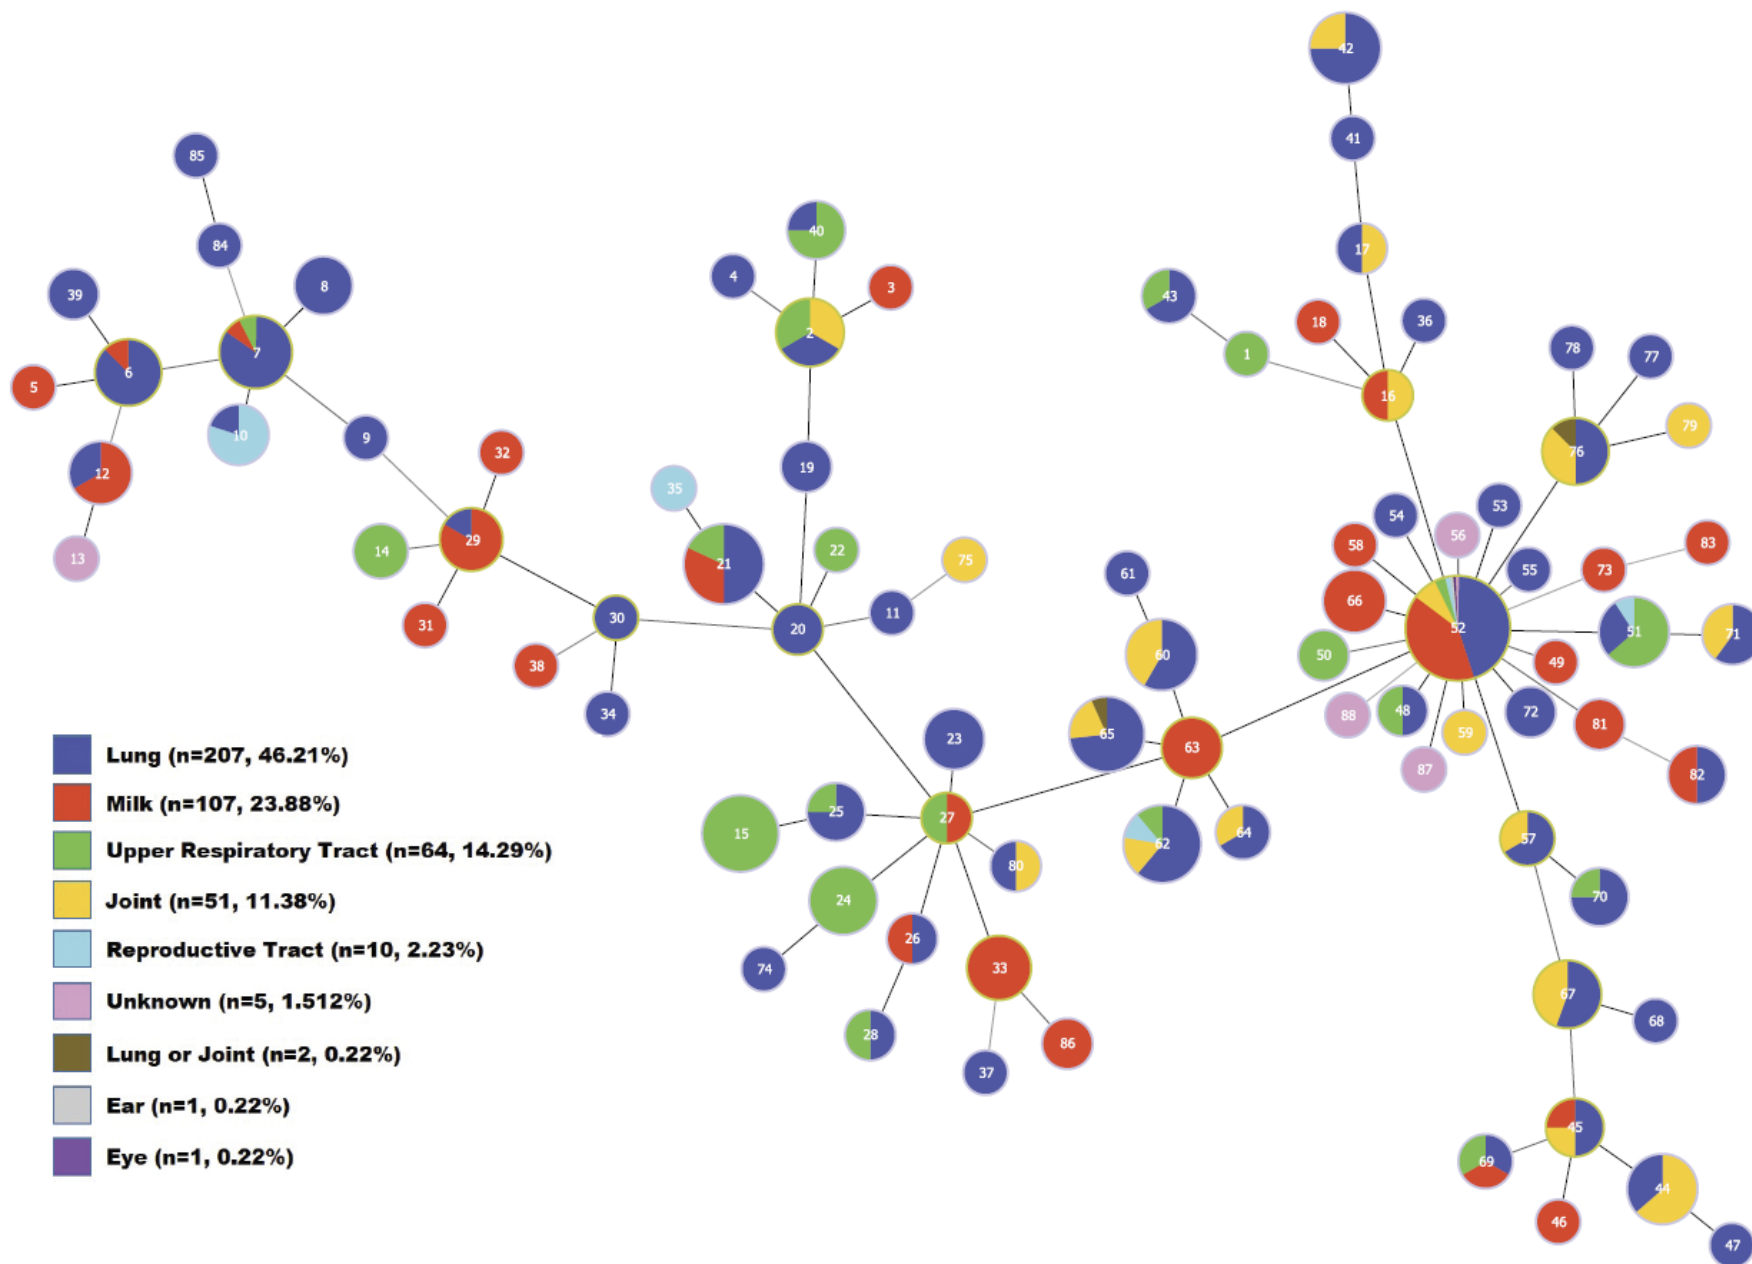

Fig. S7. Minimum spanning tree depicting evolutionary relationships among the 88 STs defined by the revised PubMLST scheme for *M. bovis* found among the 448 isolates included in this study. STs are indicated by the numeral in each circle. Circles, or portions thereof, are sized in proportion to the number of isolates with the indicated ST (log scale) and colored in accordance with the anatomic site of origin, as specified in the color key.

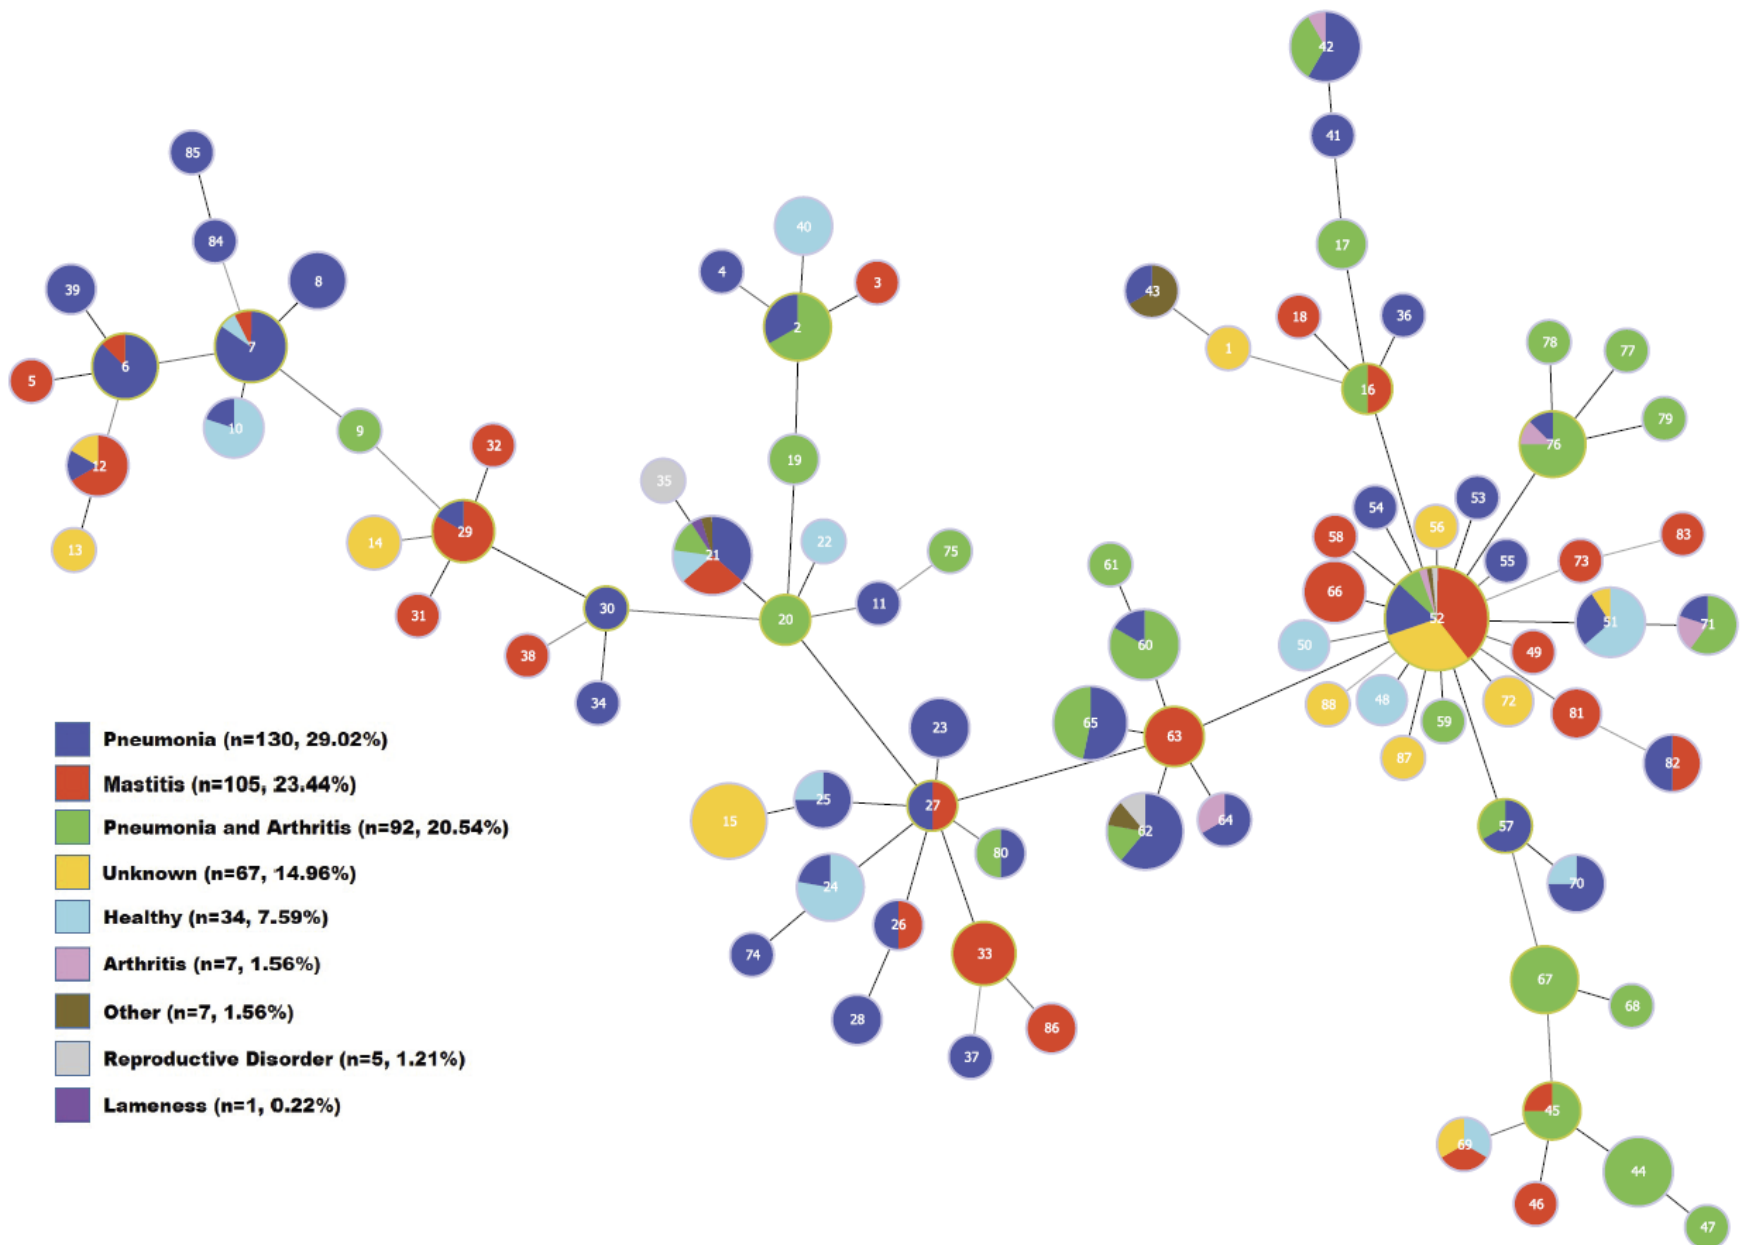

Fig. S8. Minimum spanning tree depicting evolutionary relationships among the 88 STs defined by the revised PubMLST scheme for *M. bovis* found among the 448 isolates included in this study. STs are indicated by the numeral in each circle. Circles, or portions thereof, are sized in proportion to the number of isolates with the indicated ST (log scale) and colored in accordance with the clinical status of the animal of origin, as specified in the color key.

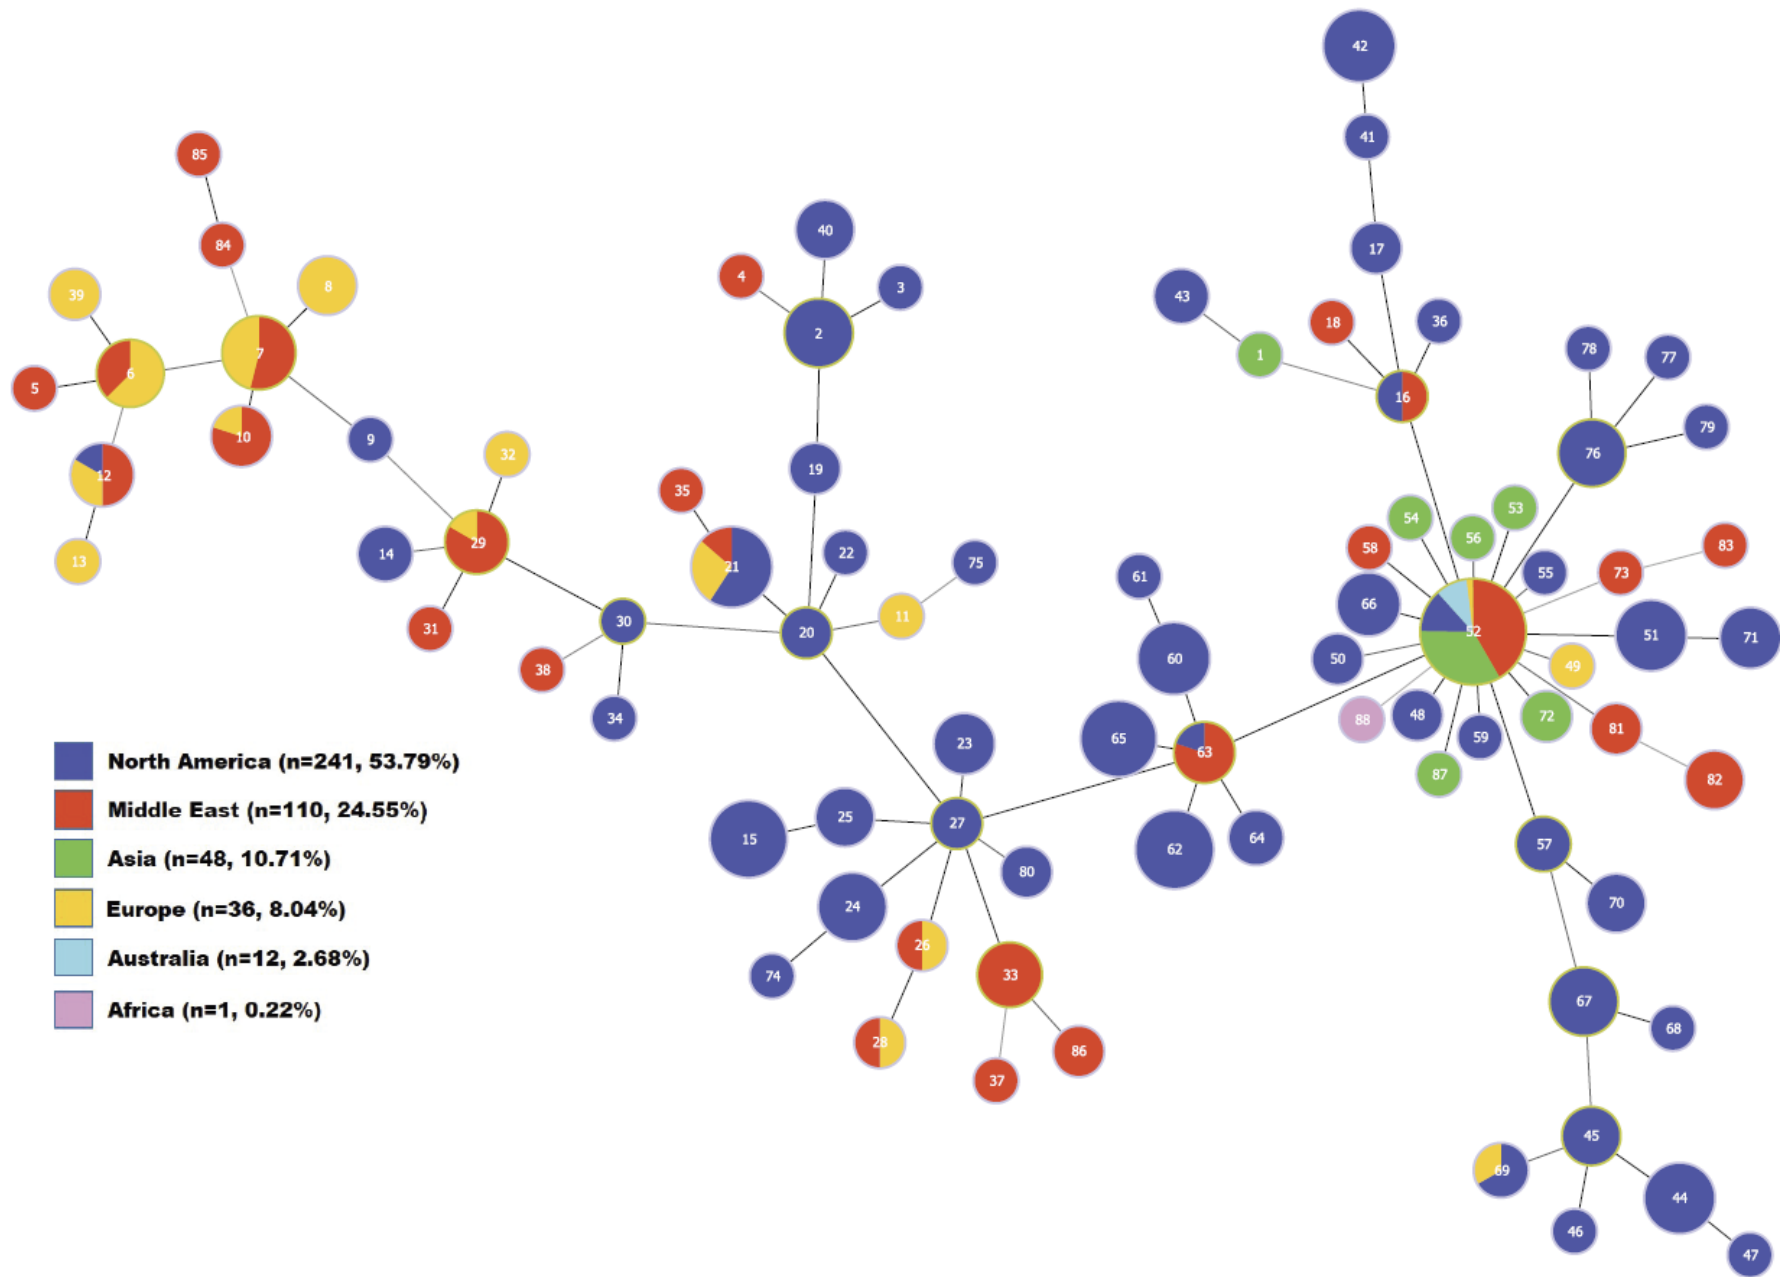

Fig. S9. Minimum spanning tree depicting evolutionary relationships among the 88 STs defined by the revised PubMLST scheme for *M. bovis* found among the 448 isolates included in this study. STs are indicated by the numeral in each circle. Circles, or portions thereof, are sized in proportion to the number of isolates with the indicated ST (log scale) and colored in accordance with the geographic origin, as specified in the color key.



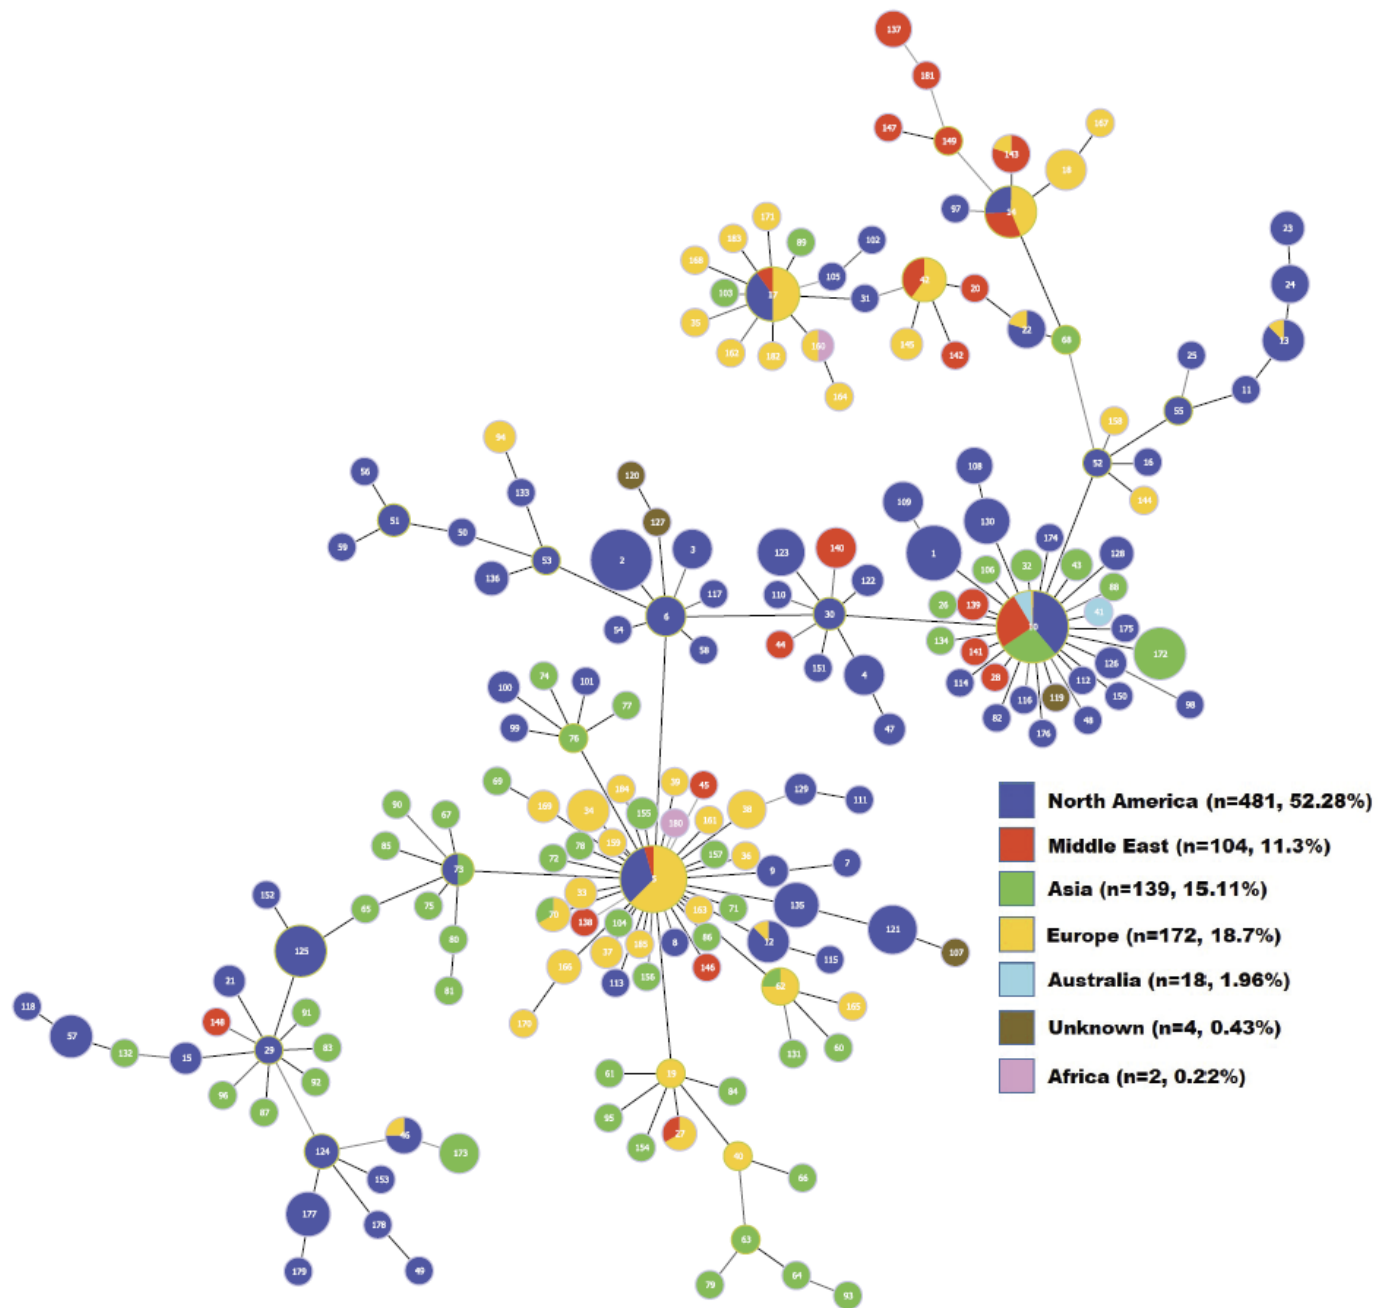

Fig. S10. Minimum spanning tree depicting evolutionary relationships among the 185 STs defined by the original PubMLST scheme for *M. bovis* found among the 920 isolates thus far submitted to the PubMLST database. STs are indicated by the numeral in each circle. Circles, or portions thereof, are sized in proportion to the number of isolates with the indicated ST (log scale) and colored in accordance with the geographic origin, as specified in the color key.

## References

1. Register KB, Thole L, Rosenbush RF, Minion FC. 2015. Multilocus sequence typing of *Mycoplasma bovis* reveals host-specific genotypes in cattle versus bison. *Vet Microbiol* 175:92-98.
2. Register KB, Jelinski MD, Waldner M, Boatwright WD, Anderson TK, Hunter DL, Hamilton RG, Burrage P, Shury T, Bildfell R, Wolff PL, Miskimins D, Derscheid RJ, Woodbury MR. 2019. Comparison of multilocus sequence types found among North American isolates of *Mycoplasma bovis* from cattle, bison, and deer, 2007-2017. *J Vet Diagn Invest* 1:899-904.
3. Morimoto M, Kenri T, Ohmori T, Teshima K, Shibuya K, Sasakawa C, Suzuki M. 2019. Complete genome sequence of *Mycoplasma bovis* strain KG4397, isolated from cattle in Japan. *Microbiol Resour Announc* 8.
4. Rosales RS, Churchward CP, Schnee C, Sachse K, Lysnyansky I, Catania S, Iob L, Ayling RD, Nicholas RA. 2015. Global MLST analysis of *Mycoplasma bovis* isolates reveals two main population clusters. *J Clin Microbiol.* 53:789-794.
